# Supplementary material
Source: publisher figshare collection journal article supplement (https://gsajournals.figshare.com/articles/dataset/_/12971828)
Supplement: Supplementary file 1 [file 1]

**Table S1 Proportional genetic contributions of the most important founders of cultivars in the California and Cosmopolitan populations.** The proportional genetic contribution (GC) of the *i*th founder to a focal population was estimated by  $MK_i / \sum_i MK_i$ , where  $MK_i$  is the mean kinship between the *i*th founder and cultivars in a focal population. Only those founders with GC estimates  $\geq 0.10\%$  are shown. GC estimates are compiled for every founder in the S4 File for the California and S5 File for the cosmopolitan population.

| Alias                             | Species              | Origin        | Notable Descendant | GC (%) |
|-----------------------------------|----------------------|---------------|--------------------|--------|
| <b>California Population</b>      |                      |               |                    |        |
| New Jersey Scarlet                | <i>F. virginiana</i> | New Jersey    | Crescent           | 8.263  |
| Hudson Bay                        | <i>F. virginiana</i> | New York      | Methven Scarlet    | 2.691  |
| FVG Wasatch                       | <i>F. virginiana</i> | Utah          | Selva              | 1.330  |
| Unknown <i>F. chiloensis</i> 021  | <i>F. chiloensis</i> | California    | Ettersburg 121     | 0.911  |
| Unknown <i>F. chiloensis</i> 071  | <i>F. chiloensis</i> | Unknown       | Charles Downing    | 0.812  |
| Unknown <i>F. virginiana</i> 022  | <i>F. virginiana</i> | Iowa          | Downer's Prolific  | 0.328  |
| Unknown <i>F. virginiana</i> 001  | <i>F. virginiana</i> | North America | Washington         | 0.139  |
| <b>Cosmopolitan Population</b>    |                      |               |                    |        |
| New Jersey Scarlet                | <i>F. virginiana</i> | New Jersey    | Crescent           | 8.268  |
| Hudson Bay                        | <i>F. virginiana</i> | New York      | Methven Scarlet    | 3.462  |
| Unknown <i>F. chiloensis</i> 071  | <i>F. chiloensis</i> | Unknown       | Charles Downing    | 1.865  |
| Unknown <i>F. virginiana</i> 022  | <i>F. virginiana</i> | Iowa          | Downer's Prolific  | 0.939  |
| Unknown <i>F. chiloensis</i> 014  | <i>F. chiloensis</i> | California    | Ettersburg 80      | 0.663  |
| Unknown <i>F. chiloensis</i> 023  | <i>F. chiloensis</i> | Peru          | Rose Ettersburg    | 0.559  |
| Unknown <i>F. chiloensis</i> 021  | <i>F. chiloensis</i> | California    | Ettersburg 121     | 0.461  |
| Belle de Meaux                    | <i>F. vesca</i>      | France        | Louis Gauthier     | 0.353  |
| Unknown <i>F. vesca</i> 001       | <i>F. vesca</i>      | California    | Ettersburg 80      | 0.296  |
| Early Washington                  | <i>F. virginiana</i> | Ohio          | Triumvirate        | 0.189  |
| Lucida                            | <i>F. chiloensis</i> | California    | Mieze Schindler    | 0.177  |
| Unknown <i>F. chiloensis</i> 025  | <i>F. chiloensis</i> | Unknown       | La Constante       | 0.160  |
| Chili du Plougastel               | <i>F. chiloensis</i> | Chile         | Madame Moutot      | 0.149  |
| Knight's Large Scarlet            | <i>F. virginiana</i> | England       | Downton            | 0.133  |
| Unknown <i>F. virginiana</i> 018  | <i>F. virginiana</i> | Unknown       | La Constante       | 0.122  |
| Unknown <i>P. palustris</i> FX012 | <i>P. palustris</i>  | Unknown       | Frel               | 0.104  |
| FVG Wasatch                       | <i>F. virginiana</i> | Utah          | Brighton           | 0.101  |
| Unknown <i>F. virginiana</i> 006  | <i>F. virginiana</i> | Unknown       | Protem             | 0.101  |
| Unknown <i>F. chiloensis</i> 020  | <i>F. chiloensis</i> | Unknown       | Pandora            | 0.099  |
