# Supplementary material
Source: publisher figshare collection journal article supplement (https://gsajournals.figshare.com/articles/dataset/_/12971828)
Supplement: Supplementary file 2 [file 1]

# Supplement S3: Bibliography of Documents and Other Sources of Information Accessed to Reconstruct the Genealogy of Cultivated Strawberry

Dominique D.A. Pincot<sup>1</sup>, Mirko Ledda<sup>1</sup>, Mitchell J. Feldmann<sup>1</sup>, Michael A. Hardigan<sup>1</sup>, Thomas J. Poorten<sup>1</sup>, Daniel E. Runcie<sup>1</sup>, Christopher Heffelfinger<sup>2</sup>, Stephen Dellaporta<sup>2</sup>, Glenn S. Cole<sup>1</sup>, and Steven J. Knapp<sup>1,\*</sup>

<sup>1</sup>Department of Plant Sciences, One Shields Avenue, University of California, Davis, Davis, California, 95616, USA

<sup>2</sup>Department of Molecular, Cellular and Developmental Biology, 165 Prospect Street, OML 450A, Yale University, New Haven, Connecticut, 06511, USA

## Overview

Here we provide a bibliography for the 804 sources of information we located and accessed to identify the birth parents of individuals, build the pedigree database, and reconstruct the genealogy of cultivated strawberry (*Fragaria* × *ananassa*). Slightly more than half of the sources were plant patent and cultivar release documents (398-804). The unpublished laboratory notebooks of Harold E. Thomas (University of California, Berkeley) and unpublished laboratory notebooks and other documents of Royce S. Bringham (University of California, Davis) were a treasure trove of previously undocumented pedigree records that enabled us to deeply reconstruct the breeding history of the University of California, Davis Strawberry Breeding Program and more extensively connect UCD individuals to ancestors in the global genealogy. Although we exhaustively searched public sources of information, we recognize that pedigree records for several historically important public breeding programs are buried in unpublished laboratory notebooks or documents unavailable and unknown to us. Our pedigree database provides the reader with a deep foundation on which to expand the genealogy.

## Laboratory Notebooks & Library Archives

1. Harold E. Thomas, Unpublished Laboratory Notebooks. University of California, Berkeley.
2. Henry A. Wallace Collection. *Digitized Collection, Iowa Digital Library, University of Iowa*. (<http://wallace.lib.uiowa.edu>)
3. Royce S. Bringham Papers & Photograph Collection. *Special Collections, Merrill-Cazier Library, Utah State University, Logan, Utah*. USU COLL MSS 515. (<http://archiveswest.orbiscascade.org/ark:/80444/xv47241>)

## Germplasm Collection and Patent Databases

4. Deutsche Genbank Obst (DGO) (<https://www.deutsche-genbank-obst.de>)
5. GenBerry (<http://www.bordeaux.inra.fr/eustrawberrydb/>)
6. Genome Database for Rosaceae (GDR) ([https://app.bioinfo.wsu.edu/breeders\\_toolbox](https://app.bioinfo.wsu.edu/breeders_toolbox))
7. IP Australia Pericles Plant Breeders (PBR) Rights Database ([https://pericles.ipaustralia.gov.au/pbr\\_db/](https://pericles.ipaustralia.gov.au/pbr_db/)). *Note: PBR applications are listed at the end of this document.*
8. Nordic Genetic Resource Center SESTO Genebank Management Tool (NordGen SESTO) (<https://sesto.nordgen.org/>)
9. PlantAres, Network Nazionale delle Risorse Genetiche Vegetali per l'Alimentazione e l'Agricoltura (<http://planta-res.politicheagricole.it>)
10. United States Department of Agriculture Agricultural Research Service National Plant Germplasm System (USDA ARS NPGS) (<https://npgsweb.ars-grin.gov>)
11. United States Patent and Trademark Office, Plant Patent Database (<https://www.uspto.gov/>)

## Refereed Journals, Scientific Literature, & Conference Proceedings

12. Aaby, K., Mazur, S., Nes, A. & Skrede, G. Phenolic compounds in strawberry (*Fragaria x ananassa* Duch.) fruits: Composition in 27 cultivars and changes during ripening. *Food Chemistry* **132**, 86–97 (2012)
13. van Adrichem, M. & Boshier, J. A search for Verticillium resistance in strawberry varieties. *Canadian Journal of Plant Science* **42**, 365–367 (1962)
14. Ahmadi, H. & Bringham, R. S. Breeding strawberries at the decaploid level. *Journal of the American Society for Horticultural Science* **117**, 856–862 (1992)
15. Ahmadi, H. & Bringham, R. S. Genetics of sex expression in *Fragaria* species. *American Journal of Botany* **78**, 504–514 (1991)
16. Ahmadi, H., Bringham, R. S. & Voth, V. Modes of inheritance of photoperiodism in *Fragaria*. *Journal of the American Society for Horticultural Science* **115**, 146–152 (1990)
17. Alderman, W. Accomplishments in fruit breeding by state and federal experiment stations. *Proceedings of the American Society for Horticultural Science* **33**, 13–20 (1936)
18. Allan, W. Flavour in strawberries. *The Garden* **56**, 99–99 (August 5, 1899)
19. Amenduni, M., Colella, C., D'Amico, M., Bubicci, G. & Cirulli, M. Strawberry breeding for resistance to Verticillium wilt. *Acta Horticulturae* **649**, 69–72 (2004)
20. Ariza, M. T. *et al.* 'Nazaret' strawberry. *HortScience* **53**, 1384–1386 (2018)
21. Bakker, J., Bridle, P. & Bellworthy, S. J. Strawberry juice colour: a study of the quantitative and qualitative pigment composition of juices from 39 genotypes. *Journal of the Science of Food and Agriculture* **64**, 31–37 (1994)
22. Baldini, E. "Alessandra", nuova cultivar di fragola. *Rivista di ortoflorofrutticoltura italiana* **57**, 407–411 (1973)
23. Baldini, E. Quattro nuove cultivar di fragola. *Rivista di ortoflorofrutticoltura italiana* **54**, 445–455 (1970)
24. Balogh, A., Kiss, E., Szóke, A., Dénes, F. & Heszky, L. Molecular analysis of strawberry cultivars using RAPD, AP-PCR and STS markers. *International Journal of Horticultural Science* **8**, 24–28 (2002)
25. Barnet, J. An account and description of the different varieties of strawberries which have been cultivated and examined in the Garden of the Horticultural Society of London. *Transactions of the Horticultural Society of London* **6**, 145–224 (1824)
26. Barritt, B. Resistance of strawberry clones to Botrytis fruit rot. *Journal of the American Society for Horticultural Science* **105**, 160–164 (1980)
27. Bauer, A. New patterns of heterosis in *Fragaria* hybrids. In *Heterosis in Plant Breeding: Proceedings of the Seventh Congress of Eucarpia*, 163–68 (Elsevier, Amsterdam, 1976)
28. Bauer, A. Progress in breeding decaploid *Fragaria* × *vescana* hybrids. In *Progress in Temperate Fruit Breeding*, 189–191 (Springer, 1994)
29. de Boishebert, V., Giraudel, J.-L. & Montury, M. Characterization of strawberry varieties by SPME-GC-MS and Kohonen self-organizing map. *Chemometrics and Intelligent Laboratory Systems* **80**, 13–23 (2006)
30. Bringham, R. S. Cytogenetics and evolution in American *Fragaria*. *HortScience* **25**, 879–881 (1990)
31. Bringham, R., Ahmadi, H. & Voth, V. Inheritance of the day-neutral trait in strawberries. *Acta Horticulturae* **265**, 35–42 (1989)
32. Bringham, R., Hancock, J. & Voth, V. The beach strawberry, an important natural resource. *California Agriculture* **31**, 10–10 (1977)
33. Bringham, R., Hansche, P. & Voth, V. Inheritance of Verticillium wilt resistance and the correlation of resistance with performance traits of the strawberry. *Journal of the American Society for Horticultural Science* **92**, 369–375 (1968)

34. Bringham, R. & Voth, V. Tioga, a new California strawberry. *California Agriculture* **18**, 12–13 (1964)
35. Bringham, R. & Voth, V. Six new strawberry varieties released. *California Agriculture* **34**, 12–15 (1980)
36. Bringham, R. & Voth, V. Breeding octoploid strawberries. *Iowa State Journal of Research* **58**, 371–381 (1984)
37. Bringham, R. & Voth, V. New strawberry varieties: Fresno, Torrey, Wiltguard for California growing areas. *California Agriculture* **15**, 11–12 (1961)
38. Bringham, R. S., Voth, V. & Shaw, D. University of California strawberry breeding. *HortScience* **25**, 834–999 (1990)
39. Brunings, A. M., Moyer, C., Peres, N. & Folta, K. M. Implementation of simple sequence repeat markers to genotype Florida strawberry varieties. *Euphytica* **173**, 63–75 (2010)
40. Cagánová, I., Škulcová, I. & Pištánková, J. Problems and perspectives of strawberry and raspberry breeding. *Acta Horticulturae* **224**, 371–374 (1988)
41. Capocasa, F. *et al.* 'Adria' and 'Sveva': two new strawberry cultivars from the breeding programme at the Marche Polytechnic University. *Acta Horticulturae* **649**, 85–86 (2004)
42. Chandler, C., Legard, D., Dunigan, D. D., Crocker, T. & Sims, C. 'Earlibrite' strawberry. *HortScience* **35**, 1363–1365 (2000)
43. Chandler, C. K. *et al.* 'Florida Radiance' strawberry. *HortScience* **44**, 1769–1770 (2009)
44. Chandler, C. K., Legard, D. E., Crocker, T. E. & Sims, C. A. 'Carmin' strawberry. *HortScience* **39**, 1496–1497 (2004)
45. Chandler, C. K., Legard, D., Dunigan, D., Crocker, T. & Sims, C. 'Strawberry Festival' strawberry. *HortScience* **35**, 1366–1377 (2000)
46. Chandler, C. K., Legard, D. E. & Sims, C. A. 'Rosa Linda' strawberry. *HortScience* **32**, 1134–1135 (1997)
47. Chandler, C. K., Santos, B. M., Peres, N. A., Jouquand, C. & Plotto, A. 'Florida Elyana' strawberry. *HortScience* **44**, 1775–1776 (2009)
48. Chaplin, C., Stoltz, L. & Rodriguez, J. Breeding behavior of mite-resistant strawberries. *Journal of the American Society of Horticultural Science* **95**, 330–33 (1970)
49. Cho, K., Rho, I., Cho, Y. & Park, P. Analysis of genetic diversity of strawberry (*Fragaria* × *ananassa* Duch.) cultivars using AFLP and SSR markers. *Korean Journal of Breeding Science* **39**, 447–456 (2007)
50. Clark, J. Prevalence of certain diseases affecting the foliage in some strawberry progenies. *Proceedings of the American Society for Horticultural Science* **36**, 455–460 (1939)
51. Clausen, R. E. Ettersburg strawberries: successful hybridizing of many species and varieties in northern California leads to production of new sorts which are apparently adapted to meeting almost all requirements. *Journal of Heredity* **6**, 324–331 (1915)
52. Close, C. P. Report of committee on new fruits for 1921. *Proceedings of the American Pomological Society* **38** (1921)
53. Coman, M., Popescu, A. & Isac, V. New strawberry cultivars and promising selections from the Fruit Research Institute Pitesti, Romania. *Acta Horticulturae* **538**, 775–778 (2000)
54. Craig, D. & Aalders, L. Acadia strawberry. *Canadian Journal of Plant Science* **45**, 298–298 (1965)
55. Craig, D., Aalders, L. & Bishop, G. Kent strawberry. *Canadian Journal of Plant Science* **62**, 819–822 (1982)
56. Craig, D., Jamieson, A. & Sanford, K. Glooscap and Blomidon strawberries. *Canadian Journal of Plant Science* **71**, 937–941 (1991)
57. Craig, D., Jamieson, A., Sanford, K. & Nickerson, N. Annapolis and Cornwallis strawberries. *Canadian Journal of Plant Science* **71**, 933–936 (1991)

58. Dale, A. & Potter, J. W. Strawberry cultivars vary in their resistance to northern lesion nematode. *Journal of Nematology* **30**, 577 (1998)
59. Dale, A. & Sjulín, T. M. Few cytoplasm contribute to North American strawberry cultivars. *HortScience* **25**, 1341–1342 (1990)
60. Dale, A., Vandenberg, A., Wang, S. & Ricketson, C. St. Williams, Scotland and Selkirk strawberries. *Canadian journal of Plant Science* **73**, 297–300 (1993)
61. Darrow, G. M. Southern Strawberries. *Journal of Heredity* **7**, 531–540 (1916)
62. Darrow, G. M. Sterility and fertility in the strawberry. *Journal of Agricultural Research* **34** (1927)
63. Darrow, G. M. & Scott, D. H. Breeding for cold hardiness of strawberry flowers. *Proceedings of the American Society for Horticultural Science* **50**, 239–242 (1947)
64. Darrow, G. M. & Scott, D. Breeding for cold hardiness of strawberry flowers. *Proceedings of the American Society for Horticultural Science* **50**, 239–242 (1947)
65. Darrow, G. M., Waldo, G. F. & Schuster, C. E. Twelve years of strawberry breeding: a summary of the strawberry breeding work of the United States Department of Agriculture. *Journal of Heredity* **24**, 391–402 (1933)
66. Darrow, G. M., Waldo, G., Schuster, C. & Pickett, B. Twelve years of strawberry breeding ii: From 170,000 seedlings, seven named varieties: A summary of the crosses made and an evaluation of their effectiveness as breeding material. *Journal of Heredity* **25**, 451–462 (1934)
67. Daubeny, H. Effect of parentage in breeding for red stele resistance of strawberry in British Columbia. *Proceedings of the American Society for Horticultural Science* **84**, 289–294 (1964)
68. Daubeny, H. A. Strawberry breeding in Canada. *HortScience* **25**, 893–894 (1990)
69. Daubeny, H. A. Tyee strawberry. *Canadian Journal of Plant Science* **60**, 743–746 (1980)
70. Daubeny, H. A., Moore, P., Sjulín, T., Lawrence, F. & Barritt, B. ‘Shuswap’ strawberry. *HortScience* **26**, 433–435 (1991)
71. Daubeny, H. A. & Pepin, H. S. Evaluation of strawberry clones for fruit rot resistance. *Journal of the American Society for Horticultural Science* **102**, 431–435 (1977)
72. Debnath, S., Khanizadeh, S., Jamieson, A. & Kempler, C. Inter simple sequence repeat (issr) markers to assess genetic diversity and relatedness within strawberry genotypes. *Canadian Journal of Plant Science* **88**, 313–322 (2008)
73. Degani, C. *et al.* A comparison of genetic relationship measures in strawberry (*Fragaria* × *ananassa* Duch.) based on AFLPs, RAPDs, and pedigree data. *Euphytica* **117**, 1–12 (2001)
74. Denoyes-Rothan, B., Guérin, G., Lerceteau-Köhler, E. & Risser, G. Inheritance of resistance to *Colletotrichum acutatum* in *Fragaria* × *ananassa*. *Phytopathology* **95**, 405–412 (2005)
75. Diamanti, J. *et al.* Increasing strawberry fruit sensorial and nutritional quality using wild and cultivated germplasm. *PLoS One* **7** (2012)
76. Domínguez, P. *et al.* ‘Fontanilla’ strawberry. *HortScience* **50**, 759–761 (2015)
77. Domínguez, P. *et al.* ‘Santaclara’ strawberry. *HortScience* **47**, 948–951 (2012)
78. Dziadczyk, E., Dziadczyk, P. & Tyrka, M. Gene pool variation of *Fragaria* × *ananassa* (Duch.) and *Fragaria vesca* (L.). *Acta Scientiarum Polonorum. Hortorum Cultus* **14** (2015)
79. Eikemo, H. & Stensvand, A. Resistance of strawberry genotypes to leather rot and crown rot caused by *Phytophthora cactorum*. *European Journal of Plant Pathology* **143**, 407–413 (2015)
80. Eikemo, H., Stensvand, A., Davik, J. & Tronsmo, A. Resistance to crown rot (*Phytophthora cactorum*) in strawberry cultivars and in offspring from crosses between cultivars differing in susceptibility to the disease. *Annals of Applied Biology* **142**, 83–89 (2003)

81. Esteca, F. *et al.* Resistance of new strawberry genotypes to the two-spotted spider mite (Acari: Tetranychidae). *Journal of Agricultural Science* **9**, 119–129 (2017)
82. Etter, A. F. Adaptations and Characteristics of Eppersburg Strawberry. *Pacific Rural Press*, 100-105 (January 6, 1918)
83. Evans, W. Centennial everbearing strawberry. *Canadian Journal of Plant Science* **55**, 647–647 (1975)
84. Ezell, B. D., Darrow, G. M., Wilcox, M. S. & Scott, D. Aseorbic acid content of strawberries. *Food Research* **12**, 510–26 (1947)
85. Faedi, W. *et al.* Advances in strawberry breeding for north of Italy. *Acta Horticulturae* **842**, 545–548 (2009)
86. Faedi, W. *et al.* Recent progress in strawberry breeding in Italy. *Acta Horticulturae* **567**, 157–160 (2002)
87. Faedi, W. *et al.* Three new Italian strawberry cultivars for southern areas. *Acta Horticulturae* **842**, 549–552 (2009)
88. Faedi, W. & Baruzzi, G. New strawberry cultivars from Italian breeding activity. *Acta Horticulturae* **649**, 81–84 (2004)
89. Faedi, W., Baruzzi, G. & Lucchi, P. Outstanding strawberry selections from Italian breeding activity. *Acta Horticulturae* **626**, 125–132 (2003)
90. Faedi, W., Mourgues, F. & Rosati, C. Strawberry breeding and varieties: situation and perspectives. *Acta Horticulturae* **567**, 51–59 (2002)
91. Faedi, W., Rosati, P. & D'ercole, N. The strawberry breeding program for North Italy. *Acta Horticulturae* **265** 53–60 (1989)
92. Farmer, L. J. Are Fall or Ever-bearing strawberries a success? *Proceedings of the American Pomological Society* **35**, 132-137 (1917)
93. Finn, C. E. *et al.* 'Charm' strawberry. *HortScience* **48**, 1184–1188 (2013)
94. Finn, C. E. *et al.* 'Marys Peak' strawberry. *HortScience* **53**, 395–400 (2018)
95. Finn, C. E. *et al.* 'Sweet Sunrise' strawberry. *HortScience* **49**, 1088–1092 (2014)
96. Finn, C. E. *et al.* 'Sweet Bliss' strawberry. *HortScience* **46**, 1701–1705 (2011)
97. Finn, C. E. *et al.* 'Valley Red' strawberry. *HortScience* **44**, 1468–1471 (2009)
98. Finn, C. E., Retamales, J. B., Lobos, G. A. & Hancock, J. F. The Chilean strawberry (*Fragaria chiloensis*): Over 1000 years of domestication. *HortScience* **48**, 418–421 (2013)
99. Finn, C. E., Yorgey, B., Strik, B. C. & Moore, P. P. 'Tillamook' and 'Pinnacle' strawberries. *HortScience* **39**, 1487–1489 (2004)
100. Fletcher, S. W. *Fragaria virginiana* in the evolution of the garden strawberry of North America. *Proceedings of the Society for Horticultural Science* **15**, 125-137 (1915)
101. Fletcher, S. W. One hundred years of strawberry growing in North America. *Proceedings of the American Pomological Society* **35**, 125-132 (1917)
102. Funt, R. C. Estimated Budget Analysis for Strawberry Production in the Midwest, 2005. *Proceedings of the Illinois Small Fruit & Strawberry Schools*, 106-109 (2005)
103. Galletta, G. Strawberry breeding in the United States in the last 10 years: Progress and objectives. *Rivista di ortoflorofruitticoltura italiana* 157–171 (1980)
104. Galletta, G. *et al.* 'Delmarvel' strawberry. *HortScience* **30**, 1099–1103 (1995)
105. Galletta, G. *et al.* 'Mohawk' strawberry. *HortScience* **30**, 631–634 (1995)
106. Galletta, G. *et al.* New strawberries from the USDA cooperative breeding programmes. *Acta Horticulturae* **439**, 227–232 (1997)



107. Galletta, G. *et al.* 'Primetime' strawberry. *HortScience* **31**, 1038–1042 (1996)
108. Galletta, G., Draper, A. & Maas, J. Combining disease resistance, plant adaptation and fruit quality in breeding short day and day-neutral strawberries. *Acta Horticulturae* **265**, 43–52 (1989)
109. Galletta, G., Draper, A. & Maas, J. Lester strawberry. *HortScience* **22**, 321–323 (1987)
110. Galletta, G., Smith, B. & Gupton, C. Strawberry parent clones US 70, US 159, US 292, and US 438 resistant to anthracnose crown rot. *HortScience* **28**, 1055–1056 (1993)
111. Gambardella, M., Cadavid-Labrada, A., Diaz, V. & Fiore, N. Caratterizzazione di varietà di fragola in Cile utilizzando marcatori RAPD. *Frutticoltura* **12**, 89–93 (2000)
112. Gao, Q., Ye, Z., Zheng, H. & Zhang, X. A new strawberry cultivar 'Shenmei 3#'. *Acta Horticulturae* **842**, 403–406 (2009)
113. Gardner, C. F. Breeding Everbearing Strawberries. *Report of the Iowa State Horticultural Society* **45**, 144–148 (1910)
114. Giménez, G., Vicente, E. & Manzzioni, A. La primera variedad de frutilla obtenida en Uruguay. *El País Agropecuario* 25–28 (2002)
115. Gooding, H. Methods of evaluating strawberry plants as sources of field resistance to *Phytophthora fragariae* hickman. *Euphytica* **22**, 141–149 (1973)
116. Gooding, H. Studies on field resistance of strawberry varieties to *Phytophthora fragariae*. *Euphytica* **21**, 63–70 (1972)
117. Gooding, H., Jennings, D. & Topham, P. A genotype-environment experiment on strawberries in Scotland. *Heredity* **34**, 105–115 (1975)
118. Graham, J., McNicol, R. & McNicol, J. A comparison of methods for the estimation of genetic diversity in strawberry cultivars. *Theoretical and Applied Genetics* **93**, 402–406 (1996)
119. Gil-Ariza, D. J. *et al.* Impact of plant breeding on the genetic diversity of cultivated strawberry as revealed by expressed sequence tag-derived simple sequence repeat markers. *Journal of the American Society for Horticultural Science* **134**, 337–347 (2009)
120. Gilbert, F. A. The 'Badgerlo' Strawberry. *Fruit Varieties Journal* **27**, 69 (1973)
121. Govan, C., Simpson, D., Johnson, A., Tobutt, K. & Sargent, D. A reliable multiplexed microsatellite set for genotyping *Fragaria* and its use in a survey of 60 *F. × ananassa* cultivars. *Molecular Breeding* **22**, 649–661 (2008)
122. Govorova, G. Strawberry breeding in Russia. *Acta Horticulturae* **348**, 45–55 (1993)
123. Günaydın, S. & Kafkas, S. Characterization of strawberry cultivars by SSR and CAPS markers. *Acta Horticulturae* **1156**, 171–178 (2017)
124. Gupton, C. L. & Smith, B. J. Inheritance of resistance to *Colletotrichum* species in strawberry. *Journal of the American Society for Horticultural Science* **116**, 724–727 (1991)
125. Hamato, N. *et al.* 'Niigata S3' is a new strawberry cultivar suitable for forcing culture under low temperature and insolation conditions. *Breeding Science* **64**, 427–434 (2014)
126. Hancock, J. F. *et al.* Reconstruction of the strawberry, *Fragaria × ananassa*, using genotypes of *F. virginiana* and *F. chiloensis*. *HortScience* **45**, 1006–1013 (2010)
127. Hancock, J. F., Callow, P. W., Serce, S. & Schilder, A. C. Relative performance of strawberry cultivars and native hybrids on fumigated and nonfumigated soil in Michigan. *HortScience* **36**, 136–138 (2001)
128. Hancock, J. F., Edger, P. P., Callow, P. W., Herlache, T. & Finn, C. E. Generating a unique germplasm base for the breeding of Day-neutral strawberry cultivars. *HortScience* **53**, 1069–1071 (2018)
129. Harris, R. Protem strawberry. *Canadian Journal of Plant Science* **45**, 299–299 (1965)

130. Haymes, K. *et al.* Development of SCAR markers linked to a *Phytophthora fragariae* resistance gene and their assessment in European and North American strawberry genotypes. *Journal of the American Society for Horticultural Science* **125**, 330–339 (2000)
131. Herrington, M. E., Chandler, C. K., Moisaner, J. A. & Reid, C. E. 'Rubygem' strawberry. *HortScience* **42**, 1482–1483 (2007)
132. Hietaranta, T. & Parikka, P. 'Suvetar' and 'Valotar': new strawberry cultivars. *Agricultural and Food Science* **17**, 146–152 (2008)
133. Hietaranta, T. & Parikka, P. 'Suvetar' and 'Valotar': new strawberry cultivars from MTT breeding programme. *Acta Horticulturae* **842**, 519–520 (2009)
134. Hiirsalmi, H. Small fruit breeding in Finland. *Agricultural and Food Science* **60**, 223–234 (1988)
135. Hiirsalmi, H., Junnila, S. & Säkö, J. Strawberry breeding in Finland. *Acta Horticulturae* **265**, 69–74 (1988)
136. Hiirsalmi, H. & Säkö, J. Developing cold-tolerant fruit cultivars in Finland. *HortScience* **26**, 504–507 (1991)
137. Honjo, M. *et al.* Maternal lineages of the cultivated strawberry, *Fragaria* × *ananassa*, revealed by chloroplast dna variation. *HortScience* **44**, 1562–1565 (2009)
138. Honjo, M. *et al.* Varietal differences and selection indicators for flowering pattern in everbearing strawberry. *Journal of the Japanese Society for Horticultural Science* **80**, 38–44 (2011)
139. Horvath, A. *et al.* Structured diversity in octoploid strawberry cultivars: importance of the old European germplasm. *Annals of Applied Biology* **159**, 358–371 (2011)
140. Hričovský, I. & Šimánek, J. Contribution to the problem of small fruit breeding. *Acta Horticulturae* **140**, 133–141 (1983)
141. Hughes, J. d. Strawberry June Yellows: a review. *Plant pathology* **38**, 146–160 (1989)
142. Hulewicz, T. & Hortynski, J. Strawberry breeding at the Agricultural University in Lublin. *Acta Horticulturae* **265**, 181–184 (1988)
143. Il, R., Cho, Y., Cheong, J. & Jeong, H. Breeding of "Wongyo 3111", intermediate strawberry parent line with high sugar content and large-sized fruit. *Korean Journal of Breeding Science* **41**, 319–323 (2009)
144. Jamieson, A. Developing fruit cultivars for organic production systems: A review with examples from apple and strawberry. *Canadian Journal of Plant Science* **86**, 1369–1375 (2006)
145. Jamieson, A. New cultivars and selections from the Kentville strawberry breeding programme. *Acta Horticulturae* **439**, 233–236 (1997)
146. Jamieson, A. *et al.* 'Cabot' strawberry. *HortScience* **39**, 1778–1780 (2004)
147. Jamieson, A. New strawberry from the AAFC breeding program at Kentville. *Acta Horticulturae* **567**, 153–156 (2002)
148. Jamieson, A. & Nickerson, N. Recent progress in breeding strawberries for Atlantic Canada. *Acta Horticulturae* **265**, 85–90 (1989)
149. Jamieson, A., Nickerson, N., Forney, C., Sanford, K. & Craig, D. 'Mira' strawberry. *HortScience* **36**, 389–391 (2001)
150. Jamieson, A. R. 'AAC Lila' strawberry. *HortScience* **49**, 833–834 (2014)
151. Jamieson, A. R. 'Annapolis' strawberry. *Journal of the American Pomological Society* **57**, 98 (2003)
152. Jamieson, A. R., Hildebrand, P. D. & Renderos, W. E. Breeding strawberry plants resistant to angular leafspot disease. *International Journal of Fruit Science* **13**, 28–35 (2013)
153. Jamieson, A. R., Sanderson, K. R., Privé, J.-P. & Tremblay, R. J. 'Wendy' strawberry. *HortScience* **44**, 836–838 (2009)
154. Jamieson, A. R., Sanderson, K. R., Privé, J.-P. & Tremblay, R. J. 'Valley Sunset' strawberry. *HortScience* **45**, 663–665 (2010)

155. Jamieson, A. R., Sanderson, K. R. & Tremblay, R. J. 'Laurel' strawberry. *HortScience* **47**, 431–433 (2012)
156. Javouhey, M. & Chausset, D. Marabella: a new short-day strawberry cultivar. *Acta Horticulturae* **439**, 269–274 (1997)
157. Johnson, A., Passey, A., Whitehouse, A., Simpson, D. & Hammond, K. Six new strawberry cultivars from East Malling Research. *Acta Horticulturae* **842**, 525–528 (2009)
158. Jones, D. F. & Singleton, W. R. The Shelton and Hebron Strawberries. *Connecticut Agricultural Experiment Station, New Haven Circular* **137** (1939)
159. Jung, H. *et al.* A system for distinguishing octoploid strawberry cultivars using high-throughput SNP genotyping. *Tropical Plant Biology* **10**, 68–76 (2017)
160. Kaczmarek, E. *et al.* Hybrid performance and heterosis in strawberry (*Fragaria* × *ananassa* Duchesne), regarding acidity, soluble solids and dry matter content in fruits. *Plant Breeding* **135**, 232–238 (2016)
161. Keens, M. An account of a new strawberry. *Transactions of the Horticultural Society of London* **2** (1814)
162. Kempler, C. *et al.* 'Stolo' strawberry. *HortScience* **46**, 1046–1048 (2011)
163. Kesici, M. *et al.* Heat-stress tolerance of some strawberry (*Fragaria* × *ananassa*) cultivars. *Notulae Botanicae Horti Agrobotanici Cluj-Napoca* **41**, 244–249 (2013)
164. Khanizadeh, S. Breeding strawberries for eastern central Canada. In *Progress in Temperate Fruit Breeding*, 183–187 (Springer, 1994)
165. Khanizadeh, S. *et al.* 'Clé des Champs' strawberry. *HortScience* **41**, 1360–1361 (2006)
166. Khanizadeh, S. *et al.* 'Saint-Laurent d'Orleans' strawberry. *HortScience* **40**, 2195–2196 (2005)
167. Khanizadeh, S. *et al.* 'Saint-Pierre' strawberry. *HortScience* **37**, 1133–1134 (2002)
168. Khanizadeh, S. *et al.* 'St-Jean d'Orléans' strawberry. *HortScience* **42**, 168–169 (2007)
169. Khanizadeh, S., Buszard, D., Carrise, O. & Thibodeau, P. O. 'Joliette' strawberry. *HortScience* **31**, 1036–1037 (1996)
170. Khanizadeh, S., Cousineau, J., Deschênes, M., Levasseur, A. & Carisse, O. Roseberry and Rosalyne: two new hardy, day-neutral, red flowering strawberry cultivars. *Acta Horticulturae* **567**, 173–174 (2000)
171. Khanizadeh, S., Deschênes, M. & Dubé, C. 'Roseberry' strawberry. *HortScience* **45**, 1545–1546 (2010)
172. Khanizadeh, S., Thériault, B., Carisse, O. & Buszard, D. 'AC-L'Acadie' strawberry. *HortScience* **34**, 743–744 (1999)
173. Kim, J. *et al.* Genotyping of octoploid strawberry inbred lines by SNP discovery using genotyping-by-sequencing. *Horticulture, Environment, and Biotechnology* **60**, 69–80 (2019)
174. Kim, H. J., Lee, J. N., Cho, K. S., Won, H. S. & Suh, J. T. Genetic diversity and population structure analysis of Ever-bearing and June-bearing strawberry cultivars using SSR markers. *Horticultural Science and Technology* **37**, 108–118 (2019)
175. Kim, S. K., Kim, D. S., Kim, D. Y. & Chun, C. Variation of bioactive compounds content of 14 oriental strawberry cultivars. *Food Chemistry* **184**, 196–202 (2015)
176. Kim, S. W. *et al.* Rapid discrimination of commercial strawberry cultivars using Fourier transform infrared spectroscopy data combined by multivariate analysis. *Plant Biotechnology Reports* **3**, 87–93 (2009)
177. Kishaba, A., Voth, V., Howland, A., Bringhurst, R. & Toba, H. Twospotted spider mite resistance in California strawberries. *Journal of Economic Entomology* **65**, 117–119 (1972)
178. Kronenberg, H. G., Van de Lindeloof, C. & Wassenaar, L. Strawberry breeding for red core resistance in the Netherlands. *Euphytica* **20**, 228–234 (1971)
179. Kronenberg, H. G. & Van Der Giessen, A. Testing strawberries for resistance to Verticillium wilt. *Euphytica* **17**, 141–152 (1968)



180. Krstić, Đ. *et al.* Distribution of elements in seeds of some wild and cultivated fruits: Nutrition and authenticity aspects. *Journal of the Science of Food and Agriculture* **99**, 546–554 (2019)
181. Kuniyama, M., Fukino, N. & Matsumoto, S. Development of cleavage amplified polymorphic sequence (CAPS) markers for identification of strawberry cultivars. *Euphytica* **134**, 209–215 (2003)
182. Kuras, A. & Korbin, M. Comparison of suitability of RAPD and ISSR techniques for determination of strawberry (*Fragaria* × *ananassa* Duch.) relationship. *Plant Cell, Tissue and Organ Culture* **79**, 189–193 (2004)
183. Kuras, A. & Korbin, M. PCo-A analysis of strawberry germplasm used in European breeding programs, based on evaluation of DNA polymorphism of investigated plants. *Journal of Fruit and Ornamental Plant Research* **18**, 7–16 (2010)
184. Landry, B., Rongqi, L. & Khanizadeh, S. A cladistic approach and RAPD markers to characterize 75 strawberry cultivars and breeding lines. *Advances in Strawberry Research* **16**, 28–33 (1997)
185. Landry, B., Rongqi, L. & Khanizadeh, S. Classification of 75 strawberry cultivars and breeding lines using RAPD markers. *Acta Horticulturae* **439**, 101–106 (1996)
186. Lawrence, F., Galletta, G. & Scott, D. Strawberry breeding work of the US Department of Agriculture. *HortScience* **25**, 895–896 (1990)
187. Lee, C., Jang, P., Kim, D. & Yang, W. New strawberry, ‘Damhyang’ with high sugar content and early harvesting. *Korean Breeding Society Symposium (한국육종학회 심포지엄)*, 16 (2014)
188. Lee, C., Jang, P., Seo, J., Shin, G. & Yang, W. A new strawberry ‘Jukhyang’ with high sugar content and firmness. In *Acta Horticulturae*, vol. 1117, 39–44 (2016)
189. Lee, J. N., Kim, H. J., Kim, K. D., Yoo, D. L. & Suh, J. T. Characteristics of new ever-bearing strawberry ‘Gwanha’ cultivar for ornamental horticulture. *Horticultural Science & Technology* **30**, 784–787 (2012)
190. Lee, J. N., Kim, H. J., Kim, K. D., Yoo, D. L. & Suh, J. T. Characteristics of new ever-bearing strawberry ‘Yeolha’ for high yield. *Korean Journal of Horticultural Science & Technology* **32**, 739–743 (2014)
191. Lei, J., Xue, L., Dai, H. & Deng, M. Two new pink-flowered strawberry cultivars ‘Pink Beauty’ and ‘Pretty Beauty’. *Acta Horticulturae* **1049**, 219–224 (2014)
192. Lewers, K. S. *et al.* ‘Flavorfest’ strawberry. *HortScience* **52**, 1627–1632 (2017)
193. Lewers, K. S., Enns, J. M. & Castro, P. ‘Keepsake’ strawberry. *HortScience* **54**, 362–367 (2019)
194. Lewers, K., Maas, J., Hokanson, S. C., Gouin, C. & Hartung, J. Inheritance of resistance in strawberry to bacterial angular leafspot disease caused by *Xanthomonas fragariae*. *Journal of the American Society for Horticultural Science* **128**, 209–212 (2003)
195. Lim, S. *et al.* The genetic diversity among strawberry breeding resources based on SSRs. *Scientia Agricola* **74**, 226–234 (2017)
196. López-Aranda, J. M. *et al.* ‘Medina’ strawberry. *HortScience* **40**, 482–483 (2005)
197. López-Aranda, J. M. *et al.* ‘Aguedilla’ strawberry. *HortScience* **40**, 2197–2199 (2005)
198. Luby, J. J. Breeding cold-hardy fruit crops for Minnesota. *HortScience* **26**, 507–512 (1991)
199. Luby, J. J., Wildung, D. K. & Galletta, G. J. MNUS 248 (Mesabi™) strawberry. *HortScience* **38**, 481–483 (2003)
200. Luby, J. J., Wildung, D. K. & Galletta, G. J. MNUS 210 (Winona™) strawberry. *HortScience* **36**, 392–394 (2001)
201. Lundergan, C. Inheritance of ascorbic acid content and color intensity in fruits of strawberry (*Fragaria* × *ananassa* Duch.). *Journal of the American Society for Horticultural Science* **100**, 633–635 (1975)
202. Maas, J., Gouin, C., Hokanson, S. & Hartung, J. Strawberry parent clones US 4808 and US 4809 resistant to bacterial angular leafspot disease caused by *Xanthomonas fragariae*. *HortScience* **37**, 716–718 (2002)

203. Maclachlan, J. B. Three new strawberry cultivars being prepared for release. *Farm and Food Research* **14**, 24–25 (1983)
204. Macoun, W. T. Results in Fruit Breeding at the Experimental Farm, Ottawa. *Proceedings of the American Society for Horticultural Science* **18**, 37–40 (1920)
205. Mangandi, J. *et al.* Pedigree-based analysis in a multiparental population of octoploid strawberry reveals QTL alleles conferring resistance to *Phytophthora cactorum*. *G3: Genes, Genomes, Genetics* **7**, 1707–1719 (2017)
206. Markocic, M. & Roudeillac, P. Progress in strawberry breeding at CIREF-france for fruit flavour and disease resistance. *Acta Horticulturae* **567**, 161–164 (2002)
207. Martelli, G. *et al.* Strawberry cultivars genetic relationship using randomly amplified polymorphic DNA (RAPD) analysis. *Advances in Horticultural Science* **13**, 99–104 (1999)
208. Masny, A. & Żurawicz, E. ‘Pink Rosa’ strawberry. *HortScience* **50**, 1585–1587 (2015)
209. Masny, A., Żurawicz, E. & Markowski, J. ‘Grandarosa’ strawberry. *HortScience* **50**, 1401–1404 (2015)
210. McNicol, R., Graham, J. & Kerby, N. Recent advances in strawberry breeding and product development at SCRI. *Acta Horticulturae* **439**, 129–132 (1997)
211. Melville, A., Draper, A. & Galletta, G. Transmission of red stele resistance by inbred strawberry selections. *Journal of the American Society for Horticultural Science* **105**, 608–610 (1980)
212. Minegishi, M. Strawberry production in Japan: cultivar, cultivating method, main disease and breeding. *Acta Horticulturae* **265**, 665–670 (1989)
213. Mochizuki, T. *et al.* Recent trends on strawberry cultivars and production technology in Japan. *Acta Horticulturae* **761**, 107–113 (2007)
214. Mochizuki, T. *et al.* ‘Yotsuboshi’, a new F1 hybrid strawberry of seed propagation type for year-round production. *Acta Horticulturae* **1156**, 53–60 (2017)
215. Mochizuki, T., Noguchi, Y. & Sone, K. Processing quality of decaploid strawberry lines derived from *Fragaria* × *ananassa* and diploid wild species. *Acta Horticulturae* **567**, 239–242 (2002)
216. Moore, P. P. & Finn, C. E. Schwartz’ (Puget Summer’®) strawberry. *HortScience* **37**, 230–232 (2002)
217. Moore, P. P., Sjulín, T. M. & Shanks, C. H. ‘Puget Reliance’ strawberry. *HortScience* **30**, 1468–1469 (1995)
218. Mori, T. *et al.* Development of F1-hybrid strawberry of seed propagation type named ‘Yotsuboshi’ by collaborative breeding among institutes. *Horticulture Research (Japan)* **14**, 409–418 (2015)
219. Morren, C., & Morren. É. Note sur la Fraise-Ananas Tardive de Frogmore. *La Belgique Horticole, Journal Des Jardins* **11**, 124 (1861)
220. Morrow, E. & Darrow, G. Effects of limited inbreeding in strawberries. *Proceedings of the American Society for Horticultural Science* **59**, 269–276 (1952)
221. Mortensen, E. & Yarnell, S. Breeding strawberries for Texas. *Proceedings of the American Society for Horticultural Science* **35**, 57–59 (1937)
222. Na, Y.-W. *et al.* Breeding of ‘Daewang’ strawberry for forcing culture with good taste and fragrance. *Horticultural Science & Technology* **31**, 648–651 (2013)
223. Navatel, J. & Krúger, E. From Finland to Turkey: the European strawberry cultivar network. *Acta Horticulturae* **649**, 125–130 (2004)
224. Nes, A. Evaluation of strawberry cultivars in Norway. *Acta Horticulturae* **439**, 275–280 (1997)
225. Nes, A., Gullord, M., Alsheikh, M. & Sween, R. Strawberry breeding in norway: progress and future. *Acta Horticulturae* **842**, 499–502 (2008)

226. Olbricht, K., Gerischer, U., Weiß, K. & Ulrich, D. 'Renaissance' of flavor: portrait of a new European strawberry cultivar. *Acta Horticulturae* **1156**, 635–642 (2017)
227. Olbricht, K., Dathe, B. & Ulrich, D. Cross breeding with accessions of *Fragaria chiloensis* resulting in selections with outstanding disease resistance and fruit quality characteristics. *Acta Horticulturae* **708**, 507–510 (2006)
228. Olbricht, K., Pohlheim, F., Eppendorfer, A., Vogt, F. & Rietze, E. Strawberries as balcony fruit. *Acta Horticulturae* **1049**, 215–218 (2014)
229. Ourecky, D. K. Holiday strawberry. *Canadian Journal of Plant Science* **53**, 347–348 (1973)
230. Ourecky, D. & Slate, G. Behavior of the everbearing characteristics in strawberries. *Journal of the American Society for Horticultural Science* **91**, 236–241 (1967)
231. Overcash, J., Fister, L. & Drain, B. Strawberry breeding and inheritance of certain characteristics. *Proceedings of the American Society for Horticultural Science* **42**, 435–440 (1943)
232. Øydvin, J. Important breeding goals in strawberries and recent progress. *Acta Horticulturae* **265**, 189–190 (1989)
233. Paprstein, F., Ludvikova, J. & Sedlak, J. Germplasm of strawberry in Czech Republic. *Acta Horticulturae* **1049**, 859–862 (2014)
234. Particka, C. A. & Hancock, J. F. Field evaluation of strawberry genotypes for tolerance to black root rot on fumigated and nonfumigated soil. *Journal of the American Society for Horticultural Science* **130**, 688–693 (2005)
235. Pérez-Jiménez, R. *et al.* Resistance of several strawberry cultivars against three different pathogens. *Spanish Journal of Agricultural Research* **10**, 502–512 (2012)
236. Pierini, S., Capocasa, F., Diamanti, J. & Mezzetti, B. Strawberry breeding program at Marche Polytechnic University. *Acta Horticulturae* **842**, 467–470 (2009)
237. Pincot, D. D. *et al.* Genome-wide association mapping uncovers Fw1, a dominant gene conferring resistance to Fusarium wilt in strawberry. *G3: Genes, Genomes, Genetics* **8**, 1817–1828 (2018)
238. Plekhanova, M. & Petrova, M. Influence of black plastic soil mulching on productivity of strawberry cultivars in Northwest Russia. *Acta Horticulturae* **567**, 491–494 (2002)
239. Prince, W. R. The strawberries of the world, and their normal scientific character. *The Horticulturist* **17**, 31–42 (1862)
240. Rahman, M., Ballington, J. & Louws, F. Role of foliar hemibiotrophic and fruit resistance in anthracnose-resistant strawberry genotypes for annual hill plasticulture systems. *Annals of Applied Biology* **163**, 102–113 (2013)
241. Raseira, M. C. *et al.* The CNPFT/EMBRAPA fruit breeding program in Brazil. *HortScience* **27**, 1154–1157 (1992)
242. Razavi, F., De Keyser, E., De Riek, J. & Van Labeke, M. C. A method for testing drought tolerance in *Fragaria* based on fast screening for water deficit response and use of associated AFLP and EST candidate gene markers. *Euphytica* **180**, 385–409 (2011)
243. Roach, J. A. *et al.* FaRXf1: a locus conferring resistance to angular leaf spot caused by *Xanthomonas fragariae* in octoploid strawberry. *Theoretical and Applied Genetics* **129**, 1191–1201 (2016)
244. Rosati, P., Faedi, W., D'ercole, N., & Lucchi, P. 'Don', 'Miss', e 'Nike': tre nuove cultivar di fragola per la Valle Padana. *Frutticoltura* **11**, 21–27 (1993)
245. Rosenfeld, H. J. & Nes, A. Prediction of sensory quality of strawberry jam by means of sensory quality attributes of fresh fruits. *Journal of the Science of Food and Agriculture* **80**, 1895–1902 (2000)
246. Rugienius, R. *et al.* Characterization of strawberry (*Fragaria* × *ananassa* Duch.) cultivars and hybrid clones using SSR and AFLP markers. *Zemdirbyste-Agriculture* **102** (2015)
247. Salinas, N., Verma, S., Peres, N. & Whitaker, V. M. FaRCa1: a major subgenome-specific locus conferring resistance to *Colletotrichum acutatum* in strawberry. *Theoretical and Applied Genetics* **132**, 1109–1120 (2019)

248. Salinas, N. R. *et al.* Validation of molecular markers associated with perpetual flowering in octoploid *Fragaria* germplasm. *Molecular Breeding* **37**, 70 (2017)
249. Sánchez-Sevilla, J. F. *et al.* Diversity arrays technology (DArT) marker platforms for diversity analysis and linkage mapping in a complex crop, the octoploid cultivated strawberry (*Fragaria* × *ananassa*). *PLoS One* **10** (2015)
250. Schafleitner, S. *et al.* Genetic variation of resistance of the cultivated strawberry to crown rot caused by *Phytophthora cactorum*. *Journal of Berry Research* **3**, 79–91 (2013)
251. Schrader, A. L. & Scott, D. H. Quality comparisons of strawberry varieties as affected by processing with the freezing method. *Proceedings of the American Society for Horticultural Science* **50**, 246–250 (1947)
252. Scott, D. Breeding and improvement of the strawberry in the United States of America: A review. *Horticulture Research* **2**, 35–55 (1962)
253. Scott, D. Guardian, a new root rot resistant strawberry variety. *Fruit Varieties and Horticultural Digest* **24**, 62–5 (1970)
254. Scott, D. & Draper, A. Reaction of strawberry seedlings inoculated with race composites of *Phytophthora fragariae* Hickman. *Journal of the American Society for Horticultural Science* **101**, 355–358 (1976)
255. Scott, D., Draper, A. & Galletta, G. Breeding strawberries for red stele resistance. *Plant Breeding Reviews* **2**, 195–214 (1984)
256. Scott, D. H., Jeffers, W. F., Darrow, G. M. & Ink, D. P. Further studies on the response of strawberry varieties and selections to strains of the red stele root disease. *Plant Disease Reporter* **35**, 134–135 (1951)
257. Scott, L. E. & Schrader, A. L. Ascorbic acid content of strawberry varieties before and after processing by freezing. *Proceedings of the American Society for Horticultural Science* **50**, 251–253 (1947)
258. Shaw, D. V. Heterogeneity of segregation ratios from selfed progenies demonstrate polygenic inheritance for day neutrality in strawberry (*Fragaria* × *ananassa* Duch.). *Journal of the American Society for Horticultural Science* **128**, 504–507 (2003)
259. Simpson, D. The performance of North American day-neutral cultivars and the use of this germplasm for breeding in the United Kingdom. *Acta Horticulturae* **348**, 124–130 (1993)
260. Simpson, D. Resistance to *Botrytis cinerea* in pistillate genotypes of the cultivated strawberry *Fragaria ananassa*. *Journal of Horticultural Science* **66**, 719–723 (1991)
261. Simpson, D., Bell, J. & Grabham, K. Progress in breeding strawberries for an extended season in the United Kingdom. *Acta Horticulturae* **439**, 133–138 (1997)
262. Simpson, D., Bell, J., Hammond, K. & Whitehouse, A. Latest strawberry cultivars from Horticulture Research International. *Acta Horticulturae* **567**, 165–168 (2002)
263. Simpson, D., Hammond, K. & Whitehouse, A. Two new strawberry cultivars from East Malling Research. *Acta Horticulturae* **708**, 565–568 (2006)
264. Simpson, D., Whitehouse, A., Johnson, A., McLeary, K. & Passey, A. 'Elegance' and 'Vibrant', two new strawberry cultivars for programmed cropping in northern Europe. *Acta Horticulturae* **1049**, 259–261 (2014)
265. Sjulín, T. & Dale, A. Genetic diversity of North American strawberry cultivars. *Journal of the American Society for Horticultural Science* **112**, 375–385 (1987)
266. Slate, G. The best parents in strawberry breeding. *Proceedings of the American Society for Horticultural Science* **28**, 107–111 (1931)
267. Smith, B. J. USDA-ARS strawberry Anthracnose resistance breeding program. *Acta Horticulturae* **708**, 463–470 (2006)
268. Smith, B. *et al.* 'Pelican' strawberry. *HortScience* **33**, 1082–1084 (1998)
269. Smith, L. M. & Goldsmith, E. V. The Cyclamen Mite, *Tarsonemus pallidus*, and its control on field strawberries. *Hilgardia* **10**, 53–94 (1936)

270. Sønsteby, A. & Heide, O. Long-day control of flowering in everbearing strawberries. *The Journal of Horticultural Science and Biotechnology* **82**, 875–884 (2007)
271. Sønsteby, A. & Heide, O. Quantitative long-day flowering response in the perpetual-flowering F1 strawberry cultivar Elan. *The Journal of Horticultural Science and Biotechnology* **82**, 266–274 (2007)
272. Soria, C. *et al.* ‘Amiga’ strawberry. *HortScience* **43**, 943–944 (2008)
273. Soria, C. *et al.* ‘Fuentepina’ strawberry. *HortScience* **45**, 448–450 (2010)
274. Stahler, M. M. *et al.* ‘Redgem’ and ‘Bountiful’ strawberries. *HortScience* **29**, 1203–1205 (1994)
275. Stahler, M. M., Lawrence, F. J., Martin, L. W., Moore, P. P. & Daubeny, H. A. ‘Redcrest’ strawberry. *HortScience* **30**, 635–636 (1995)
276. Stegmeir, T. L., Finn, C. E., Warner, R. M. & Hancock, J. F. Performance of an elite strawberry population derived from wild germplasm of *Fragaria chiloensis* and *F. virginiana*. *HortScience* **45**, 1140–1145 (2010)
277. Strong, W. Strawberry breeding at the Ontario Horticultural Experiment Station. *Scientific Agriculture* **4**, 217–222 (1924)
278. Sturzeanu, M. *et al.* Molecular characterization of allelic status of the Rpf1 and Rca2 genes in six cultivars of strawberries. *Acta Horticulturae* **1139**, 107–112 (2016)
279. Trajkovski, K. Further work on species hybridization in *Fragaria* at Balsgård. *Acta Horticulturae* **439**, 67–74 (1997)
280. Trajkovski, K. Progress report in *Fragaria* species hybridization at Balsgård, Sweden. *Acta Horticulturae* **348**, 131–136 (1993)
281. Trajkovski, K. Further work on species hybridization in *Fragaria* at Balsgård. *Acta Horticulturae* **439**, 67–74 (1997)
282. Trajkovski, K. Rebecka, a day-neutral *Fragaria* × *vescana* variety from Balsgard. *Acta Horticulturae* **567**, 177–178 (2002)
283. Varney, E., Moore, J. & Scott, D. Field resistance of 29 additional strawberry varieties and selections to *Verticillium*, 1959. *Plant Disease Reporter* **44**, 370–1 (1960)
284. Vicente, E. *et al.* Strawberry breeding in Uruguay. *Acta Horticulturae* 411–414 (2009)
285. Vicente, A. D. E., Manzioni, T. G. A., Giménez, A. M. G. & Vilaró, A. P. F. La variedad de frutilla INIA Guenoa. *Revista INIA* **10**, 38 (2007)
286. Wada, T. *et al.* Development of a core collection of strawberry cultivars based on SSR and CAPS marker polymorphisms. *The Horticulture Journal* **86**, 365–378 (2017)
287. Waldo, G. F., Darrow, G. M., Jeffers, W., Demaree, J. & Meader, E. Breeding strawberries for resistance to red stele root disease. *Transactions of the Peninsula Horticultural Society* **36**, 22–33 (1947)
288. Wang, S. Y., Galletta, G. J. & Maas, J. L. Chemical characterization of 24 strawberry cultivars and selections. *Journal of Small Fruit & Viticulture* **5**, 21–36 (1997)
289. Whitaker, V. M. *et al.* ‘Florida Beauty’ strawberry. *HortScience* **52**, 1443–1447 (2017)
290. Whitaker, V. M. *et al.* Sensation<sup>TM</sup> ‘Florida127’ strawberry. *HortScience* **50**, 1088–1091 (2015)
291. Whitaker, V. M. *et al.* Winterstar<sup>TM</sup> (‘FL 05-107’) strawberry. *HortScience* **47**, 296–298 (2012)
292. Whitehouse, A. *et al.* ‘Malling centenary’, a short-day strawberry cultivar from NIAB-EMR. *Acta Horticulturae* **1156**, 185–188 (2016)
293. Wilhelm, S. The garden strawberry: A study of its origin: Hardy and prolific new world species contributed to the development of the strawberry’s exceptional quality, productivity, and adaptability. *American Scientist* **62**, 264–271 (1974)
294. Williams, H. June yellows: a genetic disease of the strawberry. *Journal of Genetics* **53**, 232 (1955)



295. Wójcik-Seliga, J., Studnicki, M. & Wójcik-Gront, E. Evaluating economic value of 23 strawberry cultivars in the climatic conditions of Central Europe. *Acta Scientiarum Polonorum. Hortorum Cultus* **16** (2017)
296. Xue, L., Lei, J. & Dai, H. Two new pink-flowered strawberry cultivars 'Sijihong' and 'Xiaotaohong'. *Acta Horticulturae* **1156**, 141–144 (2017)
297. Yang, L., Li, L. & Hao, B. The application and selection of new strawberry varieties of Shimei series. *Acta Horticulturae* **708**, 569–572 (2006)
298. Yang, L., Li, L., Zhang, J.-J. & Dong, H. A new strawberry cultivar 'Shimei 8'. *Acta Horticulturae* **1156**, 189–190 (2017)
299. Yoon, M.-Y. *et al.* Genetic diversity and population structure analysis of strawberry (*Fragaria* × *ananassa* Duch.) using SSR markers. *Electronic Journal of Biotechnology* **15**, 6–6 (2012)
300. Yoshida, Y. Strawberry production in Japan: history and progress in production technology and cultivar development. *International Journal of Fruit Science* **13**, 103–113 (2013)
301. Yoshida, Y., Tamura, H. & Koyama, N. Inheritance of pelargonidin malonylglucoside synthesis in strawberry. *Acta Horticulturae* **522**, 147–154 (2000)
302. Żebrowska, J. *et al.* Nutraceutical value of the new strawberry cultivars. *Acta Scientiarum Polonorum-Hortorum Cultus* **15**, 71–82 (2016)
303. Zhang, Y. *et al.* Current status of strawberry production and research in china. *Acta horticulturae* **1049**, 67–71 (2014)
304. Zhang, Y. *et al.* Current strawberry programmes at the Beijing Academy of Agriculture and Forestry Sciences. *Acta Horticulturae* **1156**, 123–130 (2017)
305. Zhao, M., Su, J., Qiang, Y. & Wang, Z. Advances in strawberry breeding in China. *Acta Horticulturae* **708**, 557–558 (2006)
306. Zhao, M., Wang, Z., Yu, H., Wang, Q. & Cai, W. A new strawberry cultivar 'zijin jiu hong'. *Acta Horticulturae* **1156**, 131–134 (2017)
307. Żurawicz, E. & Masny, A. 'Granda Rosa': New Polish strawberry cultivar. *Acta Horticulturae* **1049**, 849–852 (2014)
308. Żurawicz, E. & Masny, A. New strawberry cultivars from the breeding project of Research Institute of Pomology and Floriculture (RIPF), Skierniewice, Poland. *Acta Horticulturae* **567**, 179–181 (2002)
309. Żurawicz, E., Pluta, S. & Danek, J. Small fruit breeding at the Research Institute of Pomology and Floriculture in Skierniewice, Poland. *Acta Horticulturae* **538**, 457–461 (2000)

## Books & Catalogues

310. Allen, W. F. *Allen's Book of Berries*. (W. F. Allen Company, Salisbury, Maryland, 1952)
311. American Pomological Association. *Register of New Fruit and Nut Varieties*. (<http://americanpomological.org/fruit-and-nut-cultivars/>)
312. Baldini, E. & Branzanti, C. *Monografia delle principali cultivar di fragola non rifioventi* (Istituto Coltivazioni Arboree dell'Università di Bologna, Italy, 1964)
313. Beckett, E. *The Book of the Strawberry* (John Lane, London, 1902)
314. Bringham, R. S. *California Strawberry Advisory Board Strawberry Research Bulletins, 1954-1990*. (California Strawberry Advisory Board, Monterey, California, 1991)
315. Brooks, R. M., & Olmo, H. P. *Register of New Fruit and Nut Varieties*. (University of California Press, Berkeley, 1972), 2nd edn
316. Brooks, R. M., & Olmo, H. P. *Register of New Fruit and Nut Varieties: 1920-1950*. (University of California Press, Berkeley, 1952), 1st edn

317. Brooks, R. M., Olmo, H. P. & Brooks, R. M. *Brooks and Olmo Register of Fruit & Nut Varieties* (ASHS press, 1997), 3rd edn
318. Darrow, G. M. *The Strawberry: History, breeding and physiology*. (Holt, Rinehart & Winston, New York, 1966)
319. Darwin, C. *The Variation of Animals and Plants under Domestication* (John Murray London, 1868)
320. Dass Nursery Company. *Breeders of thoroughbred pedigree strawberry plants*. Dass Nursery Company, Bridgman, Michingan (1923)
321. Decaisne, J. *Le jardin fruitier du muséum, ou iconographie de toutes les espèces et variétés d'arbres fruitiers cultivés dans cet établissement avec leur description, leur histoire, leur synonymie, etc.* (Imprimeurs de L'Institute de France, Paris, 1875)
322. Etter, A. F. *Ettersburg Strawberries, describing varieties and breeding methods as practiced at Ettersburg Experiment Place, Ettersburg, Humboldt County, Cal.* Eureka Printing Company, Eureka, California (1920)
323. Farmer, L. J. *Farmer on the Strawberry*. (The Democrat Press, Pulaski, New York 1912)
324. Flansburgh, C.N. & Son. *New Strawberries: all about the new everbearers and other important varieties*. (Flansburgh's Strawberry Catalog, C. N. Flansburgh & Son, Jackson, Michigan, 1914)
325. Fletcher, S. W. *The Strawberry in North America: history, origin, botany, and breeding* (The Macmillan Company, New York, 1917)
326. Freeman, J. F. *High Plains Horticulture: A History* (University Press of Colorado, Boulder, 2008)
327. Gloede, F. *Les bonnes fraises* (Librairie Centrale d'Agriculture et de Jardinage, Paris, 1865)
328. Hanke, M.-V. & Flachowsky, H. *Obstzüchtung und wissenschaftliche Grundlagen* (Springer, 2017)
329. Hedrick, U. P. *Cyclopedia of Hardy Fruits* (Macmillan, New York, 1922)
330. Hedrick, U. P. *The Small Fruits of New York* (J. B. Lyon Company, Printers, Albany, 1925)
331. Khanizadeh, S. & Deschênes, M. *Our Strawberries: Les Fraisiers de Chez Nous* (Department of Agriculture and Agri-Food Canada, 2005)
332. de Lambertye, L. *Le Fraisier: sa botanique, son histoire, sa culture* (Librairie Centrale D'Agriculture et de Jardinage, Paris, 1864)
333. Lindley, J. *Pomologica Britannica: figures and descriptions of the most important varieties of fruit cultivated in Great Britain* (Henry G. Bohn, London, 1841)
334. Merrick Jr., J. M. *The Strawberry, and Its Culture: With a Descriptive Catalogue of All Known Varieties* (J. E. Tilton and Company, Boston, 1870)
335. Millet, A. *Les Fraisiers*. (Librarie Agricole de La Maison Rustique, Paris 1898)
336. Oldham, C. H. *The cultivation of berried fruits in Great Britain*. (Crosby Lockwood, London, 1946)
337. Pareek, O. P. & Sharma, S. *Systematic Pomology*, vol. 1 (Scientific Publishers (India), Jodhpur, India, 2017)
338. Thiele, K. P. & Knauth, A. *Die Erdbeere: sorten, kultur, beschreibung und verwendung* (Landbuch-Verlag, Hannover, 1953)
339. Thompson, R. *The Gardener's Assitant: a practical and scientific exposition of the art of gardening in all its branches*. (The Gresham Publishing Company, London, 1900)
340. Wilhelm, S. & Sagen, J. E. *A history of the strawberry, from ancient gardens to modern markets* (University of California, Division of Agricultural Sciences, 1974)
341. Veitch, J. H. *Hortus Veitchii* (J. Veitch & Sons Ltd., London, 1906)

## Cooperative Extension Bulletins and Publications

338. Akagi, H. *et al.* Nyoho, a new strawberry cultivar. *Bulletin of the Tochigi Agricultural Experiment Station (Japan)* (1985)
339. Alderman, W. H. New fruits produced at the University of Minnesota Fruit Breeding Farm. *Minnesota State Agricultural Experiment Station Bulletin* **230** (1926)
340. Baker, R. E. & Voth, V. Breeding and testing strawberry varieties. *California State Agricultural Experiment Station* **714** (1949)
341. Banga, O. Strawberry breeding in the United States. *Wageningen Institute for the Breeding of Horticultural Crops Bulletin* **7** (1947) → *Original in German*: Banga, O. De veredeling van de aardbei in de verenigde staten van amerika. *Instituut voor de veredeling van tuinbouwgewassen wageningen mededeling* **7** (1947)
342. Bringham, R. S., Voth, V., & Shaw, D. V. Pomology 1986 Strawberry Research Report for the California Strawberry Advisory Board. California Strawberry Advisory Board. (1986)
343. Canadian Food Inspection Agency, Plant Breeders' Right Office. Applications under examination: Strawberry (*F* × *ananassa*). *Plant Varieties Journal* **106** (2018)
344. Converse, R. H. Virus diseases of small fruits. *USDA ARS Agriculture Handbook* **631** (1987)
345. Craig, D. L. Strawberry cultivars for Eastern Canada. *Agriculture Canada Publication* **1744/F** (1982)
346. Cummings, M. B. and Jenkins, E. W. Sterility of Strawberries, Strawberry Breeding. *Vermont State Agricultural Experiment Station Bulletin* **232** (1923)
347. Darrow, G. Finer strawberries ahead. *USDA Yearbook of Agriculture* 293–299 (1943)
348. Darrow, G. M. Everbearing Strawberries. *United States Department of Agricultural Farmers' Bulletin* **901** (1917)
349. Darrow, G. M. Strawberry culture. *United States Department of Agriculture Bulletins* **1026, 1027, & 1028** (1920)
350. Darrow, G. M. *Strawberry improvement*, 445–495 (United States Department of Agriculture Yearbook of Agriculture, 1937)
351. Darrow, G. M. The Blakemore Strawberry. *United States Department of Agriculture Circular* **93** (1929)
352. Darrow, G. M. & Waldo, G. F. Dorsett, Fairfax, and Narcissa strawberries. *United States Department of Agriculture Circular* **257** (1933)
353. Darrow, G. M. & Waldo, G. F. Responses of strawberry varieties and species to duration of the daily light period. *United States Department of Agriculture Technical Bulletin* **453** (1934)
354. Davis, M. B., & Blair, D. S. The strawberry and its cultivation in Canada. *Canadian Department of Agriculture Publication* **621** (1951)
355. Finn, C. E., Peterson, M., Mackey, T., Martin, R., Strik, B., Buller, G., Ernst, K., Vance, A., Moore, P., & Dossett, M. 'Columbia Star', 'Charm', and 'Sweet Sunrise' breaking new trails. Extension Presentation (2014).
356. Finn, C. E., Strik, B., Peterson, M., Pace, C., & Buller, G. Lare numbers of selections for grower trials in 2008. Berry Commissions News. (Spring 2007)
357. Fletcher, S. W. North American varieties of the strawberry, with a bibliography of North American literature of the strawberry. *Virginia Agricultural Experiment Station Bulletin* **11**. (1916)
358. Guillermin, T. Des fraisiers remontants a gros fruits. *Bulletin de la Société d'Horticulture du Département De Seine-&-Oise Années 1899-1900*, 85–87 (1900)
359. Hansen, N. E., & Haralson, C. Breeding Hardy Strawberries. *South Dakota Agricultural Experiment Station Bulletin* **103** (1907)
360. Hedrick, U. P. & Taylor, O. M. Distribution of Station Strawberries and Raspberries. *New York Agricultural Experiment Station, Geneva, N.Y. Bulletin* **298** (1908)

361. Holloway, P. Last frontier's sweet nectar: strawberries. *Agroborealis* **30**, 30-32 (1988)
362. Howe, G. H. New or Noteworthy Fruits, XI. *New York State Agricultural Experiment Station, Geneva, N.Y. Bulletin* **620** (1933)
363. Kuniyama, M. Development of genome-specific DNA markers in strawberry (*Fragaria* × *ananassa* Duch.) and their use for cultivar identification. *Bulletin of the National Institute of Vegetable and Tea Science* 7–56 (2010)
364. Lawrence, F. J., Martin, L. W., & Varseveld, G. W. Strawberry Breeding and Evaluation for Mechanical Harvesting. *Oregon State Agricultural Experiment Station Technical Bulletin* **131** (1975)
365. The Legislative Assembly of Ontario. *Annual Report of the Department of Agriculture of the Province of Ontario: Volume I.* (Warwick Brothers & Rutter Printers, Toronto, 1897)
366. Macoun, W. T. Strawberry culture with descriptions and lists of varieties. *Central Experimental Farm, Ottawa, Canada Bulletin* **62** (1909)
367. Matsuda, T., Hara, H. & Izaki, M. Inheritance of some characteristics in the strawberry (*Fragaria* × *ananassa* Duch.). *Scientific Reports of the Faculty of Agriculture-Ibaraki University (Japan)* (1988)
368. Max Planck Institute. Symposium held December 4, 1968 at the Max Planck Institute for Cultivated Plants to honor the career of Professor Dr. Reinhold von Sengbusch. Max Planck Institute for Cultivated Plants, Hamburg, Germany. (1968) → *Original in German: Max Planck Institut. Vorträge gehalten am 04.12. 1968 im Max-Planck-Institut für Kulturpflanzenzüchtung Hamburg anlässlich der Emeritierung von Prof. Dr. Reinhold von Sengbusch. Max-Planck-Institut für Kulturpflanzenzüchtung, Hamburg, Deutschland.* (1968) ([https://pure.mpg.de/rest/items/item\\_37259/component/file\\_52929/content](https://pure.mpg.de/rest/items/item_37259/component/file_52929/content))
369. Monma, S., Fujino, M., Takada, K. & Okitsu, S. New strawberry variety 'Belle Rouge'. *Bulletin of the National Research Institute of Vegetables, Ornamental Plants and Tea* 1–9 (1990)
370. Mortensen, E. Strawberry varieties in Southwest Texas. *Texas Agricultural Experiment Station* **556** (1937)
371. New York State Agricultural Experiment Station (NYSAES). Developing New Fruit Varieties. (2012) (<http://www.hort.cornell.edu/brown/pdfs/newfruitimpact.pdf>)
372. Nishimoto, T. *et al.* Breeding and characteristics of a new strawberry variety 'Kotoka'. *Bulletin of the Nara Prefectural Agricultural Experiment Station* 1–10 (2010)
373. Noguchi, Y. *et al.* 'Tokun': a new aromatic decaploid interspecific hybrid strawberry. *Bulletin of the National Institute of Vegetable and Tea Science* 59–67 (2011)
374. Noguchi, Y., Mochizuki, T. & Sone, K. Breeding of a new aromatic strawberry by interspecific hybridization *Fragaria* × *ananassa* × *F. nilgerrensis*. *Journal of the Japanese Society for Horticultural science* **71**, 208–213 (2002)
375. Ohio State University Extension (OSUE). Midwest Strawberry Production Guide. *Ohio State University Extension Bulletin* **926**. (2006)
376. Oregon State Agricultural Experiment Station (OSAES). Strawberry Mechanization. *Oregon State Agricultural Experiment Station Bulletin* **645** (1980)
377. Pang, E. DNA-marker development for flavour compounds in strawberry. *Horticulture Innovation Australia Project Report* **BS12006** (2016)
378. Røen, D., Arnarson, J. K., Djurhuus, R., Iversen, A., Úlfur, O., Ágústsson, M., Alsheikh, M., Heiber, N., Hopperstad, O., & Meland, J. Evaluation of the potential for expanded berry production in the North Atlantic Region. New Strawberry Varieties and Cultivation Techniques for Iceland, the Faroe Islands, and Greenland (Nye baersortar og dyrkingsteknikk for Island, Faerøyane og Grønland). (<http://www.bst.fo/Admin/Public/Download.aspx?file=Files%2FFiler%2FBunadarstovan%2FBerjaverk%C3%A6tlan.pdf>)
379. Sako, J., Ryynanen, A., and Laurinen, E. Strawberry Variety Evaluations. *Garden Research Institute Bulletin* **19**. (1979) → *Original in Finnish: Sako, J., Ryynanen, A., ja Laurinen, E. Mansikan Lajikekokeiden Tuloksi. Puutarhantutkimuslaitoksen Tiedote* **19**. (1979)

380. Sanford, J. C., Ourecky, D. K., & Reich, J. E. Jewel Strawberry. *New York's Food and Life Sciences Bulletin* **114** (1985)
381. Slate, G. L. New Strawberry Varieties. *New York State Agricultural Experiment Station, Geneva, N.Y. Bulletin* **762** (1954)
382. Slate, G. L. & Watson, J. New Strawberry Varieties. *New York State Agricultural Experiment Station Bulletin* **795** (1963)
383. Taimatsu, T. Studies on the practical usage of everbearing cultivar in the strawberry [*Fragaria ananassa*], 2: Performance of a new cultivar "Samahberi" during summer to autumn season. *Bulletin of the Nara Agricultural Experiment Station (Japan)* (1993)
384. Talbert, T. J.. Missouri Strawberries. *University of Missouri Agricultural Experiment Station Bulletin* **242**. (1926)
385. Taylor, O. M. Newer Varieties of Strawberries. *New York State Agricultural Experiment Station Bulletin* **447** (1918)
386. Taylor, O. M. Newer Varieties of Strawberries, and Cultural Directions. *New York State Agricultural Experiment Station, Geneva, N.Y. Bulletin* **336** (1911)
387. Thomas, H. E. & Goldsmith, E. V. The Shasta, Sierra, Lassen, Tahoe, and Donner Strawberries. *University of California Agricultural Experiment Station Bulletin* **690**. (1945)
388. Viehmeyer, G. The Ogallala strawberry. *University of Nebraska and United States Department of Agriculture Publication E.C. 58-1202* (1958)
389. Waldo, G.F. Siletz: a new disease resistant strawberry. *Oregon State Agricultural Experiment Station Circular* **555** (1956)
390. Waldo, G. F. The Brightmore Strawberry. *Oregon State Agricultural Experiment Station Circular* **263** (1942)

## M.S. Theses & Ph.D. Dissertations

391. Aleksandrovna, H. S. Cultivation technologies for strawberry in North-West Russia. Dissertation. Russian State Agrarian University. (2016) → Original in Russian: Александровна, Хапова Светлана. Научное обоснование технологии культивирования земляники в Северо-Западном регионе РФ. Диссертация. Российский государственный аграрный университет. (2016)
392. Brink, K. B. Heritability of some yield components in the strawberry *Fragaria ananassa* Duch.). Thesis. University of California, Davis. (1990)
393. Koehler, G. Overwintering survival of strawberry (*F. × ananassa*): proteins associated with low temperature stress tolerance during cold acclimation in cultivars. Dissertation. Purdue University. (2011)
394. Kuniyama, M. (2008) Development of genome-specific DNA markers in cultivated strawberry and its application to varietal identification. Dissertation. Nami University Graduate School of Life and Environmental Sciences. (2008) → Original in Japanese: 國久美由紀. 栽培イチゴにおけるゲノム特異的 DNA マーカーの開発と品種識別技術への応用. 博士学位論文. 筑波大学大学院生命環境科学研究科学学位論文. (2008).
395. Mathey, M. M. Phenotyping diverse strawberry (*Fragaria* spp.) germplasm for aid in marker-assisted breeding, and marker-trait association for Red Stele (*Phytophthora fragariae* resistance marker *Rpfl*). Thesis. Oregon State University. (2013)
396. Salinas, N. R. Validation of molecular markers associated with perpetual flowering (PF) and soluble solids content (SSC) in strawberry (*Fragaria × ananassa* Duch. ex Rozier). Thesis. Oregon State University. (2015)
397. Winterbottom, C. Q. Resistance of strawberry to *Colletotrichum acutatum*. Ph.D. Thesis, University of California, Davis. (1989)



## Plant Patents and Cultivar Releases

398. Ackerman, S. M., Nelson, S. D. & Nelson, M. D. Strawberry plant named 'Glory' (U. S. Patent # US PP20,308 P2, September 15, 2009.)
399. Ackerman, S. M., Nelson, S. D. & Nelson, M. D. Strawberry plant named 'Marvel' (U. S. Patent # US PP20,307 P2, September 15, 2009.)
400. Ackerman, S. M., Nelson, S. D. & Nelson, M. D. Strawberry plant named 'Merit' (U. S. Patent # US 2012/0151646 P1, June 14, 2012.)
401. Ackerman, S. M., Nelson, S. D. & Nelson, M. D. Strawberry plant named 'Premier' (U. S. Patent # US PP20,309 P2, September 15, 2009.)
402. Ackerman, S. M., Nelson, S. D. & Nelson, M. D. Strawberry plant named 'Prestige' (U. S. Patent # US PP20,077 P2, June 9, 2009.)
403. Ackerman, S. M., Nelson, S. D. & Nelson, M. D. Strawberry plant named 'Prize' (U. S. Patent # US PP26,193 P3, December 8, 2015.)
404. Ackerman, S. M., Nelson, S. D. & Nelson, M. D. Strawberry plant named 'PS-1031' (U. S. Patent # Plant 9,909, June 3, 1997.)
405. Ackerman, S. M., Nelson, M. D. & Nelson, S. D. Strawberry plant named 'PS-1150' (U. S. Patent # Plant 10,780, February 9, 1999.)
406. Ackerman, S. M., Nelson, M. D. & Nelson, S. D. Strawberry plant named 'PS-1269' (U. S. Patent # Plant 10,686, November 17, 1998.)
407. Ackerman, S. M., Nelson, M. D. & Nelson, S. D. Strawberry plant named PS-2880 (U. S. Patent # US PP15,597 P3, March 1, 2005.)
408. Ackerman, S. M., Nelson, S. D. & Nelson, M. D. Strawberry plant named 'PS-3.108' (U. S. Patent # US PP23,291 P2, January 1, 2013.)
409. Ackerman, S. M., Nelson, S. D. & Nelson, M. D. Strawberry plant named 'PS-3456' (U. S. Patent # US PP14,457 P3, January 13, 2004.)
410. Ackerman, S. M., Nelson, S. D. & Nelson, M. D. Strawberry plant named 'PS-3523' (U. S. Patent # US PP14,447 P3, January 6, 2004.)
411. Ackerman, S. M., Nelson, S. D. & Nelson, M. D. Strawberry plant named 'PS-4634' (U. S. Patent # US PP17,487 P2, March 13, 2007.)
412. Ackerman, S. M., Nelson, S. D. & Nelson, M. D. Strawberry plant named 'PS-5298' (U. S. Patent # US PP19,583 P3, December 23, 2008.)
413. Ackerman, S. M., Nelson, S. D., Nelson, M. D., Salm, P. & Schmida, D. T. Strawberry plant named 'PS-592' (U. S. Patent # Plant 9,903, May 27, 1997.)
414. Ackerman, S. M., Nelson, S. D. & Nelson, M. D. Strawberry plant named 'PE-6.2036' (U. S. Patent # US PP26,209 P3, December 15, 2015.)
415. Ackerman, S. M., Nelson, S. D., Nelson, M. D., Salm, P. & Schmida, D. T. Strawberry plant named PS-776 (U. S. Patent # Plant 9,902, May 27, 1997.)
416. Ackerman, S. M., Nelson, S. D. & Nelson, M. D. Strawberry plant named 'Reliance' (U. S. Patent # US 2010/0122387 P1, May 13, 2010.)
417. Ackerman, S. M., Nelson, S. D. & Nelson, M. D. Strawberry plant named 'Triumph' (U. S. Patent # )
418. Ackerman, S. M., Nelson, S. D. & Nelson, M. D. Strawberry plant named 'Valor' (U. S. Patent # US PP20,394 P3, October 6, 2009.)

419. Agriculture Victoria Services Pty Ltd, Melbourne, VIC. 'Adina' (IP Australia PBR Application 1996/291, January 14, 1997.)
420. Agriculture Victoria Services Pty Ltd, Attwood, VIC. 'Kiewa' (IP Australia PBR Application 2001/349, December 3, 2001)
421. Agriculture Victoria Services Pty Ltd, Melbourne, VIC. 'Lowanna' (IP Australia PBR Application 1997/069, April 21, 1997.)
422. Agriculture Victoria Services Pty Ltd, Attwood, VIC. 'Millewa' (IP Australia PBR Application 2003/245, November 21, 2003)
423. Agriculture Victoria Services Pty Ltd, Melbourne, VIC. 'Talee' (IP Australia PBR Application 1996/289, January 14, 1997.)
424. Agriculture Victoria Services Pty Ltd, Melbourne, VIC. 'Tallara' (IP Australia PBR Application 1996/288, January 14, 1997.)
425. Alcazar, J. R. & Moreno, R. C. Strawberry plant named 'DrisStrawFortyTwo' (U. S. Patent # US 2016/0113176 P1, April 21, 2016.)
426. Amorao, A. & Ferguson, M. Strawberry plant named 'Driscoll Ojai' (U. S. Patent # US PP18,575 P3, March 11, 2008.)
427. Amorao, A. Q., Ferguson, M. & Solis Jr., A. Strawberry plant named 'Driscoll El Dorado' (U. S. Patent # US PP16,238 P2, February 7, 2006.)
428. Amorao, A. Q., Mowrey, B. D., Ferguson, M., Kodama, L. T. & Coss, J. Strawberry plant named 'Driscoll Cambria' (U. S. Patent # US PP15,596 P2, March 1, 2005.)
429. Amorao, A. Q., Mowrey, B. D., Gilford, K. L., Espejo Jr., J. I. & Sjulín, T. M. Strawberry plant named 'Baeza' (U. S. Patent # Plant 11,548, October 3, 2000.)
430. Amorao, A. Q. & Sjulín, T. M. Strawberry plant named 'San Miguel' (U. S. Patent # Plant 10,642, October 13, 1998.)
431. Amorao, A. Q., Solis Jr., A. & Ferguson, M. Strawberry plant named 'Driscoll Agoura' (U. S. Patent # PP15,731 P2, April 26, 2005.)
432. Amorao, A. Q., Solis Jr., A. & Ferguson, M. Strawberry plant named 'Driscoll Camarillo' (U. S. Patent # US PP14,771 P3, May 11, 2004.)
433. Amorao, A. Q., Solis Jr., A. & Ferguson, M. Strawberry plant named 'Driscoll El Capitan' (U. S. Patent # US PP14,005 P3, July 22, 2003.)
434. Amorao, A. Q., Solis Jr., A. & Ferguson, M. Strawberry plant named 'Driscoll Venice' (U. S. Patent # US PP14,062 P3, August 12, 2003.)
435. Amorao, A. Q., Solis Jr., A. & Sjulín, T. M. Strawberry plant named 'Canterbury' (U. S. Patent # US PP12,577 P2, April 23, 2002.)
436. Amorao, A. Q., Solis Jr., A. & Sjulín, T. M. Strawberry plant named 'Ventura' (U. S. Patent # US PP12,436 P2, March 5, 2002.)
437. Amorao, A. Q., Solis Jr., A., Sjulín, T. M. & Espejo Jr., J. I. Strawberry plant named 'Montalvo' (U. S. Patent # Plant 11,522, September 26, 2000.)
438. Augustine, J. J. & Chang, P. P. Strawberry plant called "Grace" (U. S. Patent # Plant 8,035, November 17, 1992.)
439. Bagdasarian, J. Strawberry plant named Sweet Ann (U. S. Patent # US 2011/0162119 P1, June 30, 2011.)
440. Bagdasarian, J. H. Strawberry plant named 'Camila' (U. S. Patent # US PP30,326 P2, April 2, 2019.)
441. Bagdasarian, J. H. Strawberry plant named 'Lucia' (U. S. Patent # US 2015/0128318 P1, May 7, 2015.)
442. Bagdasarian, J. H. Strawberry plant named 'Ruby June' (U. S. Patent # PP27,190 P3, September 27, 2016.)

443. Bagdasarian, J. H. Strawberry plant named 'Scarlet' (U. S. Patent # US PP27,034 P3, August 9, 2016.)
444. Ballington, J. R. Strawberry plant named 'Bish' (U. S. Patent # US PP15,552 P2, February 8, 2005.)
445. Ballington, J. R. Strawberry plant named 'Galletta' (U. S. Patent # US PP19,763 P2, February 24, 2009.)
446. Berry Genetics, Inc., Watsonville, California, USA. 'BG-3.324' (IP Australia PBR Application 2014/341, March 2, 2015.)
447. Bittner, W. *Fragaria* plant named 'Franor' (U. S. Patent # US PP12,169 P2, October 30, 2001.)
448. Bringham, R. S., Shaw, D. V. & Voth, V. Strawberry plant called 'Cuesta' (U. S. Patent # Plant 8,662, March 29, 1994.)
449. Bringham, R. S., Shaw, D. V. & Voth, V. Strawberry plant named Sunset (U. S. Patent # Plant 8,661, March 29, 1994.)
450. Bringham, R. S. & Voth, V. CN7 Strawberry Plant (U. S. Patent # Plant 4,507, March 4, 1980.)
451. Bringham, R. S. & Voth, V. Strawberry Plant (U. S. Patent # Plant 3,178, May 16, 1972.)
452. Bringham, R. S. & Voth, V. Strawberry Plant (U. S. Patent # Plant 3,561, June 4, 1974)
453. Bringham, R. S. & Voth, V. Strawberry Plant (U. S. Patent # Plant 4,481, November 13, 1979.)
454. Bringham, R. S. & Voth, V. Strawberry Plant (U. S. Patent # Plant 4,487, November 20, 1979.)
455. Bringham, R. S. & Voth, V. Strawberry Plant (U. S. Patent # Plant 4,488, November 20, 1979.)
456. Bringham, R. S. & Voth, V. Strawberry Plant (U. S. Patent # Plant 4,489, November 20, 1979.)
457. Bringham, R. S. & Voth, V. Strawberry Plant (U. S. Patent # Plant 4,490, November 27, 1979.)
458. Bringham, R. S. & Voth, V. Strawberry Plant (U. S. Patent # Plant 4,538, May 27, 1980.)
459. Bringham, R. S. & Voth, V. Strawberry Plant (U. S. Patent # Plant 4,679, March 31, 1981.)
460. Bringham, R. S. & Voth, V. Strawberry plant (U. S. Patent # Plant 6,580, January 31, 1989.)
461. Bringham, R. S. & Voth, V. Strawberry plant called "Capitola" (U. S. Patent # Plant 7,615, August 6, 1991.)
462. Bringham, R. S. & Voth, V. Strawberry plant called 'Muir' (U. S. Patent # Plant 6,558, January 24, 1989.)
463. Bringham, R. S. & Voth, V. Strawberry plant called 'Mrak' (U. S. Patent # Plant 6,579, January 31, 1989.)
464. Bringham, R. S. & Voth, V. Strawberry plant 'Fern' (U. S. Patent # Plant 5,267, August 7, 1984.)
465. Bringham, R. S. & Voth, V. Strawberry plant named 'Seascape' (U. S. Patent # Plant 7,614, August 6, 1991.)
466. Bringham, R. S. & Voth, V. Strawberry plant 'Selva' (U. S. Patent # Plant 5,266, July 31, 1984.)
467. Bringham, R. S. & Voth, V. Strawberry plant 'Soquel' (U. S. Patent # Plant 5,264, July 31, 1984.)
468. Buszard, D. & Khanizadeh, S. June-bearing strawberry named Chambly (U. S. Patent # Plant 8,853, August 2, 1994.)
469. Chandler, C. K. Strawberry plant named 'FL 05-107' (U. S. Patent # US PP23,042 P3, September 18, 2012.)
470. Chandler, C. Strawberry plant named 'Florida Elyana' (U. S. Patent # US 2009/0320168 P1, December 24, 2009.)
471. Chandler, C. Strawberry plant named 'Florida Radiance' (U. S. Patent # US PP20,363 P2, September 29, 2009.)
472. Chandler, C. K. 'Strawberry Festival' strawberry plant (U. S. Patent # US PP14,739 P2, April 27, 2004.)
473. Chandler, C. K. 'Winter Dawn' strawberry plant (U. S. Patent # US 2009/0013438 P1, January 8, 2009.)
474. Chang, P. P. Strawberry plant called 'Gem Star' (U. S. Patent # US PP12,377 P2, January 29, 2002.)
475. Chang, P. P. Strawberry plant called 'Ruby' (U. S. Patent # US PP12,283 P2, December 18, 2001.)

476. Chang, P. P. Strawberry plant called 'Treasure' (U. S. Patent # US PP12,414 P2, February 19, 2002.)
477. Chang, P. P. Strawberry plant called 'Treasure Harvest' (U. S. Patent # US PP19,422 P2, November 4, 2008.)
478. Cowles, R. S. & LaMondia, J. A. Strawberry plant name Rubicon (U. S. Patent # US 2013/0025007 P1, January 24, 2013.)
479. Crandall, B. Strawberry plant named 'Colima' (U. S. Patent # US PP13,081 P2, October 15, 2002.)
480. D'Ercole, N., Faedi, W. & Rosati, P. Strawberry plant named 'Idea' (U. S. Patent # Plant 10,982, June 29, 1999.)
481. Dai, N., Tanami, Z., Slotzky, S. & Dao, A. Strawberry plant named 'Barak' (U. S. Patent # US 2011/0107483 P1, May 5, 2011.)
482. Dai, N., Tanami, Z. & Slotzky, S. Strawberry plant named 'Tamir' (U. S. Patent # US PP20,647 P3, January 19, 2010.)
483. Dai, N., Tanami, Z., Slotzky, S. & Dao, A. Strawberry plant named 'Yasmin' (U. S. Patent # US 2016/0324051 P1, November 3, 2016.)
484. Daratech Pty Ltd, Melbourne, Victoria. 'Coogee' synonym '88-027-583' Application No 1993/136 (IP Australia PBR Application 1993/136, June 8, 1993.)
485. Daratech Pty Ltd, Melbourne, Victoria. 'Mindarie', synonym '88-023-200' (IP Australia PBR Application 1993/135, June 8, 1993)
486. Driscoll's, Inc., Watsonville, California, USA. DrisStrawFiftyThree (IP Australia PBR Application 2017/288, October 3, 2017.)
487. Driscoll's, Inc., Watsonville, California, USA. 'DrisStrawFortyFour' (IP Australia PBR Application 2017/006, February 9, 2017.)
488. Edward Vinson Limited, Kent, England. 'Sweeteve' (IP Australia PBR Application 2010/124, August 23, 2010.)
489. Ellis, J. Strawberry plant named Serenata (U. S. Patent # Plant 8,801, June 28, 1994.)
490. Ellis, J. R. Fragaria 'Frel' (U. S. Patent # Plant 7,598, July 23, 1991.)
491. Faedi, W., Baruzzi, G., Baudino, M., Giordano, R. & Lucchi, P. Strawberry plant named 'Record' (U. S. Patent # US 2009/0038039 P1, February 5, 2009.)
492. Fear, C. D., Vitten, M. D. & Ferguson, M. D. Strawberry plant named 'DrisStrawThirty' (U. S. Patent # US PP24,096 P3, December 17, 2013)
493. Fear, C. D., Vitten, M. D. & Ferguson, M. D. Strawberry plant named 'DrisStrawTwentyNine' (U. S. Patent # US 2013/0276182 P1, October 17, 2013.)
494. Ferguson, M. D. Strawberry plant named 'DrisStrawEight' (U. S. Patent # US PP20,735 P2, February 9, 2010.)
495. Ferguson, M. D. Strawberry plant named 'DrisStrawSeventeen' (U. S. Patent # US PP22,218 P2, November 1, 2011.)
496. Ferguson, M. D. Strawberry plant named 'DrisStrawSixteen' (U. S. Patent # US PP22,247 P2, November 15, 2011.)
497. Ferguson, M. D. & Alcazar, J. R. Strawberry plant named 'DrisStrawTwenty' (U. S. Patent # US PP23,383 P2, February 12, 2013.)
498. Ferguson, M., Amorao, A. Q. & Mowrey, B. D. Strawberry plant named 'DrisStrawOne' (U. S. Patent # )
499. Ferguson, M. D., Cervantes, R. & Alcazar, J. R. Strawberry plant named 'DrisStrawThirtySeven' (U. S. Patent # US PP25,866 P3 September 8, 2015.)
500. Ferguson, M. D. & Moran, T. C. Strawberry plant named 'DrisStrawEighteen' (U. S. Patent # US PP23,107 P2, October 16, 2012.)
501. Ferguson, M. D. & Moran, T. C. Strawberry plant named 'DrisStrawThirteen' (U. S. Patent # US PP21,559 P2, December 7, 2010.)

502. Ferguson, M. D. & Moran, T. C. Strawberry plant named 'DrisStrawThirtyOne' (U. S. Patent # US PP24,317 P3, March 18, 2014.)
503. Ferguson, M. D. & Moran, T. C. Strawberry plant named 'DrisStrawThirtySix' (U. S. Patent # US PP25,698 P3, July 14, 2015.)
504. Ferguson, M. D. & Moran, T. C. Strawberry plant named 'DrisStrawTwentyOne' (U. S. Patent # US PP23,506 P3, April 2, 2013)
505. Ferguson, M. D. & Moran, T. C. Strawberry plant named 'DrisStrawTwentySix' (U. S. Patent # US PP23,377 P2, February 5, 2013.)
506. Ferguson, M. D. & Moran, T. C. Strawberry plant named 'DrisStrawTwentyFive' (U. S. Patent # US PP23,382 P2, February 12, 2013.)
507. Ferguson, M. D. & Moran, T. C. Strawberry plant named 'DrisStrawTwentySeven' (U. S. Patent # US PP23,400 P2, February 19, 2013.)
508. Ferguson, M. D. & Moran, T. C. Strawberry plant named 'DrisStrawTwentyTwo' (U. S. Patent # US PP23,517 P3, April 9, 2013.)
509. Ferguson, M. D., Moran, T. C. & Lagunas, J. Strawberry plant named 'DrisStrawFortySeven' (U. S. Patent # US PP27,813 P3, March 28, 2017.)
510. Ferguson, M. D. & Mowrey, B. D. Strawberry plant named 'DrisStrawThree' (U. S. Patent # US PP19,673 P3, February 3, 2009)
511. Ferguson, M. D., Roberston, R. R. & Stewart, P. J. Strawberry plant variety named 'DrisStrawFiftySix' (U. S. Patent # US PP29,731 P2, October 9, 2018.)
512. Finn, C. E. Strawberry plant named 'Charm' (U. S. Patent # US PP25,300 P2, February 24, 2015.)
513. Finn, C. E. Strawberry plant named 'Marys Peak' (U. S. Patent # US PP29,370 P3, June 12, 2018.)
514. Finn, C. E. Strawberry plant named 'Sweet Sunrise' (U. S. Patent # US PP25,223 P2, January 13, 2015.)
515. Florida Foundation Seed Producers, Inc., Florida, USA. FL 05-107 (IP Australia PBR Application 2015/014, March 3, 2015.)
516. Franco, Z. Fragaria plant named 'Malaga' (U. S. Patent # US 2016/0374239 P1, December 22, 2016.)
517. Gilford, K. L. Strawberry plant named 'Driscoll Bonaire' (U. S. Patent # US PP18,041 P3, September 18, 2007.)
518. Gilford, K. L., Alcazar, J. R., Mowrey, B. D. & Stewart, P. J. Strawberry plant named 'DrisStrawNineteen' (U. S. Patent # US PP23,148 P2, October 30, 2012.)
519. Gilford, K. L., Amorao, A. Q., Mowrey, B. & Sjulín, T. M. Strawberry plant named 'Mirador' (U. S. Patent # Plant 11,279, March 7, 2000.)
520. Gilford, K. L. & Mowrey, B. D. Strawberry plant named Calusa (U. S. Patent # US 2003/0079263 P1, April 24, 2003.)
521. Gilford, K. L. & Mowrey, B. D. Strawberry plant named 'Driscoll Atlantis' (U. S. Patent # US PP16,475 P2, April 25, 2006.)
522. Gilford, K. L. & Mowrey, B. D. Strawberry plant named 'DrisStrawFour' (U. S. Patent # US PP19,240 P2, September 16, 2008.)
523. Gilford, K. L. & Mowrey, B. D. Strawberry plant named Madeira (U. S. Patent # US PP14,109 P3, August 26, 2003.)
524. Gilford, K. L., Mowrey, B. D. & Coss, J. Strawberry plant named 'Driscoll Destin' (U. S. Patent # US PP16,299 P2, February 28, 2006.)
525. Gilford, K. L., Mowrey, B. D. & Coss, J. Strawberry plant named 'Driscoll Malibu' (U. S. Patent # US PP16,070 P2, October 25, 2005.)



526. Gilford, K. L., Mowrey, B. D. & Coss, J. Strawberry plant named 'Driscoll Osceola' (U. S. Patent # US PP15,752 P2, May 3, 2005.)
527. Gilford, K. L., Mowrey, B. D., Fuentes, A., Espejo Jr., J. I. & Sjulín, T. M. Strawberry plant named 'Captiva' (U. S. Patent #.)
528. Gilford, K. L., Mowrey, B. D., Fuentes, A., Espejo Jr., J. I. & Sjulín, T. M. Strawberry plant named 'Captiva' (U. S. Patent # Plant 11,277, March 7, 2000.)
529. Gilford, K. L., Mowrey, B. D., Garcia, J. C., Sjulín, T. M. & Kodama, L. T. Strawberry plant named 'Biscayne' (U. S. Patent # US PP12,186 P2, November 6, 2001.)
530. Gilford, K. L., Mowrey, B. D., Garcia, J. C., Sjulín, T. M. & Kodama, L. T. Strawberry plant named 'Marathon' (U. S. Patent # US PP12,817 P2, July 30, 2002.)
531. Gilford, K. L., Mowrey, B. D., Stewart, P. J., Pullen, E. J. & Rodriguez-Alcazar, J. Strawberry plant named 'DrisStrawSeven' (U. S. Patent # US PP20,922 P2, April 6, 2010.)
532. Gilford, K. L., Pullen, E. J., Mowrey, B. D. & Stewart, P. J. Strawberry plant named 'DrisStrawTwelve' (U. S. Patent # US PP21,538 P2, November 30, 2010.)
533. Gilford, K. I., Stewart, P. J. & Pullen, E. J. Strawberry plant named 'DrisStrawSix' (U. S. Patent # US PP20,701 P2, February 2, 2010.)
534. Goldsmith, E. V. Variety of strawberry (U. S. Patent # Plant 1,735, July 29, 1958.)
535. Goldsmith, E. V. Variety of strawberry (U. S. Patent # Plant 1,736, July 29, 1958.)
536. Goldsmith, E. V. Variety of Strawberry (U. S. Patent # Plant 1,737, July 29, 1958.)
537. Hancock, J. Strawberry plant named 'Redstart' (U. S. Patent # US PP30,491 P3.)
538. Hancock, J. Strawberry plant named 'Wasatch' (U. S. Patent # US 2018/0255672 P1)
539. Herrington, M. E. & Moisanter, J. A. Strawberry plant named 'QHI Sugarbaby' (U. S. Patent # US PP16,766 P2, July 4, 2006.)
540. Herrington, M. E., Moisanter, J. A. & Chandler, C. Strawberry plant named "DPI Rubygem" (U. S. Patent # US 2005/0138703 P1, June 23, 2005.)
541. Hureau, R. Strawberry plant named 'Darsanga' (U. S. Patent # Plant 10,634, October 6, 1998.)
542. Hureau, R. Strawberry plant variety named Darselect (U. S. Patent # Plant 10,402, May 19, 1998)
543. Hureau, R. C. Strawberry plant named Darline (U. S. Patent # Plant 7,566, June 25, 1991.)
544. Hureau, R. C. Strawberry plant named Darlibelle (U. S. Patent # Plant 7,563, June 18, 1991.)
545. Izhar, S. Strawberry plant named 'Yuval' (U. S. Patent # US 2004/0133953 P1, July 8, 2004.)
546. Izhar, S. & Izsak, E. Strawberry plant Nama (U. S. Patent # Plant 8,747, May 24, 1994.)
547. Izhar, S. & Izsak, E. Strawberry plant Ofra (U. S. Patent # Plant 8,746, May 24, 1994.)
548. Izsak, E. & Izhar, S. Strawberry plant named 'Tamar' (U. S. Patent # Plant 11,135, November 30, 1999.)
549. Izhar, S. & Izsak, E. Strawberry plant Virginia (U. S. Patent # Plant 8,748, May 24, 1994.)
550. Izsak, E. & Izhar, S. Strawberry plant Dorit (U. S. Patent # Plant 7,869, May 19, 1992.)
551. Izsak, E. & Izhar, S. Strawberry plant Saaid (U. S. Patent # Plant 7,870, May 19, 1992.)
552. Izsak, E. & Izhar, S. Strawberry plant Shalom (U. S. Patent # Plant 7,876, June 2, 1992.)
553. Izsak, E. & Izhar, S. Strawberry plant Smadar (U. S. Patent # Plant 7,865, May 12, 1992.)

554. Izsak, E. & Izhar, S. Strawberry plant named 'Yael' (U. S. Patent # Plant 11,183, January 18, 2000.)
555. Izsak, E. & McNicol, R. J. Strawberry plant named 'Red Merlin' (U. S. Patent # US 2014/0096295 P1, April 3, 2014.)
556. Jamieson, A. Strawberry variety named 'Wendy' (U. S. Patent # US PP18,340 P3, December 25, 2007.)
557. Jamieson, A. R. Strawberry variety named 'Cabot' (U. S. Patent # US 2003/0154530 P1, August 14, 2003.)
558. Jamieson, A. R. Strawberry variety named 'Brunswick' (U. S. Patent # US PP16,859 P3, July 25, 2006.)
559. Jamieson, A. R. Strawberry variety named 'Evangeline' (U.S. Patent # US 2003/0159189 P1, August 21, 2003)
560. Jamieson, A. R. Strawberry variety named 'Sable' (U. S. Patent # US 2004/0205869 P1, October 14, 2004.)
561. Jamieson, A. R., Nickerson, N. L. & Craig, D. L. Strawberry variety named 'Mira' (U. S. Patent # Plant 11,438, July 11, 2000)
562. Jamieson, A. R., Nickerson, N. L. & Sanford, K. A. Strawberry plant named 'Cavendish' (U. S. Patent # Plant 11,110, October 26, 1999.)
563. Jelenkovic, G. J., Lutz, L. P., Nitzsche, P. J. & Hlubik, W. T. Strawberry plant named 'NJ99-204-1' (U. S. Patent # US 2015/0289431 P1, October 8, 2015.)
564. Johnson, Jr., H. A. Strawberry plant (U. S. Patent # Plant 2,892, June 10, 1969.)
565. Johnson, Jr., H. A. Strawberry plant (U. S. Patent # Plant 3,274, December 19, 1972.)
566. Johnson Jr., H. A. Strawberry Plant (U. S. Patent # Plant 3,286, January 9, 1973.)
567. Johnson, Jr., H. A. Strawberry plant (U. S. Patent # Plant 3,987, December 14, 1976.)
568. Johnson, Jr., H. A. Strawberry plant (U. S. Patent # Plant 4,020, March 1, 1977.)
569. Johnson, Jr., H. A. Strawberry plant (U. S. Patent # Plant 4,022, March 8, 1977)
570. Johnson, Jr., H. A. Strawberry plant (U. S. Patent # Plant 4,386, February 27, 1979.)
571. Johnson, Jr., H. A. Strawberry plant (U. S. Patent # Plant 4,387, February 27, 1979.)
572. Johnson, Jr., H. A. Strawberry plant (U. S. Patent # Plant 4,573, July 15, 1980.)
573. Johnson, Jr., H. A. Strawberry plant (U. S. Patent # Plant 4,574, July 15, 1980.)
574. Johnson, Jr., H. A. Strawberry plant (U. S. Patent # Plant 4,763, September 1, 1981.)
575. Johnson, Jr., H. A. Strawberry plant (U. S. Patent # Plant 4,768, September 22, 1981.)
576. Johnson, Jr., H. A. Strawberry plant (U. S. Patent # Plant 4,988, March 8, 1983.)
577. Johnson, Jr., H. A. Strawberry plant (U. S. Patent # Plant 5,071, July 19, 1983.)
578. Johnson Jr., H. A. Strawberry plant – 'Joe Reiter' (U. S. Patent # Plant 5,300, October 23, 1984.)
579. Johnson, Jr., H. A. Strawberry plant – 'The Crown' (U. S. Patent # Plant 5,301, October 23, 1984)
580. Johnson Jr., H. A. & Amorao, A. Q. Strawberry plant – 'Mr. P' (U. S. Patent # Plant 5,840, December 23, 1986.)
581. Johnson, Jr., H. A., Amorao, A. Q. & Espejo Jr., J. I. Strawberry plant named 'Swede' (U. S. Patent # Plant 6,191, May 31, 1988.)
582. Johnson Jr., H. A., Amorao, A. Q. & Espejo Jr., J. I. Strawberry Plant 'Ken Sheehy' (U. S. Patent # Plant 6,231, July 26, 1988.)
583. Johnson Jr., H. A., Small, D. W., Amorao, A. Q. & Espejo Jr., J. I. Strawberry plant 'Commander' (U. S. Patent # Plant 7,024, September 12, 1989.)

584. Johnson Jr., H. A., Sjulín, T. M., Amorao, A. Q. & Espejo Jr., J. I. Strawberry plant named 'E26' (U. S. Patent # Plant 7,522, May 14, 1991.)
585. Johnson, Jr., H. A., Sjulín, T. M., Small, D. W., Amorao, A. Q. & Espejo Jr., J. I. Strawberry – Anancapa (U. S. Patent # Plant 7,171, February 27, 1990.)
586. Johnson Jr., H. A. & Thomas, H. E. Strawberry Plant (U. S. Patent # Plant 2,891, June 10, 1969.)
587. Johnson Jr., H. A. & Thomas, H. E. Strawberry Plant (U. S. Patent # Plant 3,123, April 18, 1972.)
588. Kasuga, T. Strawberry Plant (U. S. Patent # Plant 1,264, March 2, 1954.)
589. Khanizadeh, S. 'AC-L'Acadie' Strawberry (U. S. Patent # US 2003/009799 P1, January 9, 2003.)
590. Khanizadeh, S. 'AC-Yamaska' Strawberry (U. S. Patent # US 2002/0166151 P1, November 7, 2002.)
591. Khanizadeh, S. Strawberry plant and fruit named 'La Cle des Champs' (U. S. Patent # US PP17,381 P3, January 23, 2007.)
592. Khanizadeh, S. Strawberry plant named 'Orleans' (U. S. Patent # US PP17,670 P3, May 1, 2007.)
593. Khanizadeh, S. Strawberry plant named 'Saint-Jean D'Orleans' (U. S. Patent # US PP18,111 P3, October 9, 2007.)
594. Khanizadeh, S. & Buszard, D. 'Joliette' Strawberry (U. S. Patent # Plant 10,460)
595. Kibbe, E. & Stewart, P. J. Strawberry plant named 'DrisStrawForty' (U. S. Patent # US PP25,747 P3, July 28, 2015.)
596. Kibbe, E., Stewart, P. J. & Calkins, M. M. Strawberry plant named 'DrisStrawFortyEight' (U. S. Patent # US PP27,442 P2, December 6, 2016.)
597. Kibbe, E., Stewart, P. J. & Mojica, A. C. Strawberry plant named 'DrisStrawFortyNine' (U. S. Patent # US 2017/0020045 P1, January 19, 2017.)
598. Knapp, S. J., Cole, G. S., Shaw, D. V. & Larson, K. D. Strawberry plant named 'UCD Victor' (U. S. Patent # US 2019/0380243 P1, December 12, 2019.)
599. Knapp, S. J., Cole, G. S., Shaw, D. V. & Larson, K. D. Strawberry plant named 'UCD Moxie' (U. S. Patent # US 2019/0380247 P1, December 12, 2019.)
600. Knapp, S. J., Cole, G. S., Shaw, D. V. & Larson, K. D. Strawberry plant named 'UCD Royal Royce' (U. S. Patent # US 2019/0380245 P1, December 12, 2019.)
601. Knapp, S. J., Cole, G. S., Shaw, D. V. & Larson, K. D. Strawberry plant named 'UCD Warrior' (U. S. Patent # US 2019/0380244 P1, December 12, 2019.)
602. Knapp, S. J., Cole, G. S., Shaw, D. V. & Larson, K. D. Strawberry plant named 'UCD Valiant' (U. S. Patent # US 2019/0380246 P1, December 12, 2019.)
603. Larse, J. Strawberry plant named 'Bob' (U. S. Patent # US 2013/0133117 P1, May 23, 2013.)
604. Larse, J. Strawberry plant named 'Crystalina' (U. S. Patent # US PP25,867 P3, September 8, 2015.)
605. Larse, J. Strawberry plant named 'Cupcake' (U. S. Patent # US PP23,956 P3, October 8, 2013.)
606. Larse, J. Strawberry plant named 'Crystalina' (U. S. Patent # US PP25,867 P3, September 8, 2015.)
607. Larse, J. Strawberry plant named 'Dani' (U. S. Patent # US 2013/0340135 P1, December 19, 2013.)
608. Larse, J. Strawberry plant named 'Flame' (U. S. Patent # US 2016/0309633 P1, October 20, 2016.)
609. Larse, J. Strawberry plant named 'Ginza' (U. S. Patent # US PP23,934 P3, October 1, 2013.)
610. Larse, J. Strawberry plant named 'Lili' (U. S. Patent # US PP25,849 P3, September 1, 2015.)
611. Larse, J. Strawberry plant named 'Zarina' (U. S. Patent # US PP 29,936 P3, October 1, 2013.)

612. Larson, K. D. & Shaw, D. V. Strawberry plant named 'Fronteras' (U. S. Patent # US PP26,709 P3, May 10, 2016.)
613. Larson, K. D. & Shaw, D. V. Strawberry plant named 'Mojave' (U. S. Patent # US 2011/0191919 P1, August 4, 2011.)
614. Larson, K. D. & Shaw, D. V. Strawberry plant named 'Petaluma' (U. S. Patent # US PP26,683 P3, May 3, 2016.)
615. Larson, K. D. & Shaw, D. V. Strawberry plant named 'Ventana' (U. S. Patent # US PP13,469 P3, January 14, 2003.)
616. Leis, M. *et al.* Strawberry plant named 'Capri' (U. S. Patent # US PP23,339 P3, January 22, 2013.)
617. Leis, M. *et al.* Strawberry plant named 'Dely' (U. S. Patent # US 2012/0210475 P1, August 16, 2012.)
618. Leis, M. *et al.* Strawberry plant named 'Ischia' (U. S. Patent # US PP24,552 P3, June 17, 2014.)
619. Leis, M. *et al.* Strawberry plant named 'Joly' (U. S. Patent # US PP23,126 P3, October 23, 2012.)
620. Leis, M. *et al.* Strawberry plant named 'Linosa' (U. S. Patent # US PP24,440 P3, May 13, 2014.)
621. Leis, M. *et al.* Strawberry plant named 'Nabila' (U. S. Patent # US PP23,338 P3, January 22, 2013.)
622. Leis, M. *et al.* Strawberry plant named 'Rania' (U. S. Patent # US 2012/0210477 P1, August 16, 2012.)
623. Leis, M. & Martinelli, A. Strawberry plant named 'Murano' (U. S. Patent # US pp25,070 P3, November 18, 2014.)
624. Leis, M., Musacchi, D. & Martinelli, A. Strawberry plant named 'Civero' (U. S. Patent # Plant 11,555, October 10, 2000.)
625. Lewers, K. S. & Enns, J. M. Strawberry plant named 'Keepsake' (U. S. Patent # US PP30,578 P2, June 18, 2019.)
626. López, J. M. A. Strawberry plant named 'Aires' (U. S. Patent # Plant 9,757, December 24, 1996.)
627. López, J. M. A. Strawberry plant named 'Arena' (U. S. Patent # Plant 9,770, December 31, 1996.)
628. López, J. M. A. Strawberry plant named Cartcua (U. S. Patent # Plant 8,598, February 15, 1994.)
629. López, J. M. A. Strawberry plant named Cartres (U. S. Patent # Plant 8,622, March 1, 1994.)
630. López, J. M. A. Strawberry plant named Cartuno (U. S. Patent # Plant 8,623, March 1, 1994.)
631. López, J. M. A. Strawberry plant named Milcin (U. S. Patent # Plant 7,861, May 5, 1992.)
632. López, J. M. A. Strawberry plant named Milsei (U. S. Patent # Plant 7,864, May 12, 1992.)
633. López, J. M. A. Strawberry plant named 'Placartfre' (U. S. Patent # US 2003/0204886 P1, October 30, 2003.)
634. López, J. M. A. Strawberry plant named 'Plahuelfre' (U. S. Patent # US PP15,153 P2, September 21, 2004.)
635. López, J. M. A. Strawberry plant named 'Plarionfre' (U. S. Patent # US 2002/0059665 P1, May 16, 2002.)
636. López, J. M. A. Strawberry plant named 'Plarocifre' (U. S. Patent # US 2003/0204885 P1, October 30, 2003.)
637. López, J. M. A. Strawberry plant named 'Sabrosa' (U. S. Patent # US PP16,558 P3, May 23, 2006.)
638. López, J. M. A. Strawberry plant named 'Tudnew' (U. S. Patent # Plant 10,960, June 15, 1999.)
639. Luby, J. J., Wildung, D. K. & Galletta, G. J. Strawberry plant named 'MNUS 248' (U. S. Patent # Plant 11,116, November 2, 1999.)
640. Luby, J. J. *et al.* Strawberry plant named 'MNUS 138' (U. S. Patent # US PP17,404 P3, February 13, 2007.)
641. Marionnet, A. Strawberry plant named "Mara des Bois" (U. S. Patent # Plant 8,517, December 28, 1993.)
642. Meulenbroek, E. J. Strawberry plant named 'Allegro' (U. S. Patent # US PP29,964 P3, December 11, 2018.)
643. Meulenbroek, E. J. Strawberry plant named 'Jive' (U. S. Patent # US PP26,711 P2, May 10, 2016.)
644. Meulenbroek, E. J. Strawberry plant named 'Opera' (U. S. Patent # US 2017/0332532 P1, November 16, 2017.)

645. Meulenbroek, E. J. Strawberry plant named 'Sonata' (U. S. Patent # US PP18,000 P2, September 11, 2007.)
646. Meulenbroek, E. J. Strawberry plant named 'Vivaldi' (U. S. Patent # US PP26,873 P2, June 28, 2016.)
647. Meulenbroek, E. J. Strawberry plant named 'Yambu' (U. S. Patent # US PP28,048 P2, May 23, 2017.)
648. Mezzetti, B. & Capocasa, F. Strawberry plant named 'Cristina' (U. S. Patent # US 2012/0311749 P1, December 6, 2012.)
649. Mezzetti, B. & Capocasa, F. Strawberry plant named 'Romina' (U. S. Patent # US 2012/0311750 P1, December 6, 2012.)
650. Moore, P. P. Strawberry plant named 'Puget Crimson' (U. S. Patent # US PP 22,781 P2, June 12, 2012.)
651. Moore, P. P. Strawberry plant 'Puget Reliance' (U. S. Patent # Plant 9,310, October 3, 1995.)
652. Mowrey, B. D. *et al.* Strawberry plant named 'Ana Maria' (U. S. Patent # Plant 11,035, August 17, 1999.)
653. Mowrey, B. D. *et al.* Strawberry plant named 'DrisStrawEleven' (U. S. Patent # US PP20,731 P2, February 9, 2010.)
654. Mowrey, B. D., Coss, J. F., Kodama, L. T. & Sjulín, T. M. Strawberry plant named 'Alisal' (U. S. Patent # Plant 11,639, November 21, 2000.)
655. Mowrey, B. D., Ferguson, M., Coss, J. F., Madesko, M. P. & Amorao, A. Q. Strawberry plant named 'DrisStrawTwo' (U. S. Patent # US PP18,878 P2, June 3, 2008)
656. Mowrey, B. D., Gilford, K. L., Kodama, L. T. & Cross, J. Strawberry plant named 'Driscoll Pearl' (U. S. Patent # US PP16,241 P2, February 7, 2006.)
657. Mowrey, B. D., Kodama, L. T. & Coss, J. Strawberry plant named 'Driscoll Lanai' (U. S. Patent # US PP15,145 P2, September 14, 2004.)
658. Mowrey, B. D., Kodama, L. T. & Coss, J. Strawberry plant named 'Driscoll Marin' (U. S. Patent # US PP15,375 P2, November 30, 2004.)
659. Mowrey, B. D., Kodama, L. T., Coss, J. F., Espejo Jr., J. I. & Sjulín, T. M. Strawberry plant named 'San Juan' (U. S. Patent # US PP12,899 P2, September 3, 2002.)
660. Mowrey, B. D., Kodama, L. T., Coss, J. F., Espejo Jr, J. I. & Sjulín, T. M. Strawberry plant named 'Sonora' (U. S. Patent # US PP13,386 P2, December 17, 2002.)
661. Mowrey, B. D., Kodama, L. T., Coss, J. & Ferguson, M. Strawberry plant named 'Driscoll Sausalito' (U. S. Patent # US PP18,040 P3, September 18, 2007.)
662. Mowrey, B. D., Stewart, P. J., Madesko, M. P. & Coss, J. F. Strawberry plant named 'DrisStrawNine' (U. S. Patent # US PP20,733 P2, February 9, 2010.)
663. Mowrey, B. D., Stewart, P. J., Madesko, M. P. & Coss, J. F. Strawberry plant named 'DrisStrawTen' (U. S. Patent # US PP20,775 P2, February 23, 2010.)
664. Nelson, M. D., Nelson, S. D. & Schmida, D. T. Strawberry plant named 'PSI 308' (U. S. Patent # Plant 8,346, August 17, 1993.)
665. Nelson, S. D., Nelson, M. D. & Stoeckle, L. W. Strawberry plant named 'BG-4.352' (U. S. Patent # US 2016/0057903 P1, February 25, 2016.)
666. Nelson, S. D., Nelson, M. D. & Stoeckle, L. W. Strawberry plant name 'BG-1975' (U. S. Patent # US PP17,725 P3, May 15, 2007.)
667. Nelson, S. D., Nelson, M. D. & Stoeckle, L. W. Strawberry plant named 'BG-3.324' (U. S. Patent # US PP23,256 P2, December 18, 2012.)
668. Nelson, S. D., Nelson, M. D. & Stoeckle, L. W. Strawberry plant named 'BG-4.367' (U. S. Patent # US PP25,865 P3, September 8, 2015.)



669. Nelson, S. D., Nelson, M. D. & Stoeckle, L. W. Strawberry plant named 'BG-4.370' (U. S. Patent # US 2016/0057904 P1, February 25, 2016.)
670. Nelson, S. D., Nelson, M. D. & Stoeckle, L. W. Strawberry plant named 'BG-6.3016' (U. S. Patent # US 2017/0071085P1, March 9, 2017.)
671. Nelson, S. D., Nelson, M. D. & Stoeckle, L. W. Strawberry plant named 'BG-6.3024' (U. S. Patent # US 2015/0059029 P1, February 26, 2015.)
672. Nelson, S. D., Nelson, M. D. & Stoeckle, L. W. Strawberry plant named 'BG-4315' (U. S. Patent # US PP23,257 P2, December 18, 2012.)
673. Nelson, S. D., Nelson, M. D. & Stoeckle, L. W. Strawberry plant named 'BG-625' (U. S. Patent # US PP13,255 P2, November 19, 2002.)
674. Nelson, S. D., Nelson, M. D. & Stoeckle, L. W. Strawberry plant named 'BG-633' (U. S. Patent # US PP13,320 P2, December 3, 2002.)
675. Nelson, S. D., Nelson, M. D. & Stoeckle, L. W. Strawberry plant named 'BG-959' (U. S. Patent # US 2006/0230479 P1, October 12, 2006.)
676. Nelson, S. D., Nelson, M. D. & Stoeckle, L. W. Strawberry plant named 'Diligent' (U. S. Patent # US PP27,441 P3, December 6, 2016.)
677. Nelson, S. D., Nelson, M. D. & Stoeckle, L. W. Strawberry plant named 'Renewal' (U. S. Patent # US PP29,795 P2, November 6, 2018.)
678. Nelson, S. D., Nelson, M. D., Stoeckle, L. W. & Nelson, D. S. Strawberry plant named 'Inspire' (U. S. Patent # US PP29,794 P2, November 6, 2018.)
679. Pierron-Darbonne, A. Strawberry plant named 'Amandine' (U. S. Patent # US PP26,059 P3, November 10, 2015.)
680. Pierron-Darbonne, A. Strawberry plant named 'Cristal' (U. S. Patent # US PP20,447 P3, November 3, 2009.)
681. Pierron-Darbonne, A. Strawberry plant named 'Deluxe' (U. S. Patent # US PP26,208 P3, December 15, 2015.)
682. Pierron-Darbonne, A. Strawberry plant named 'Donna' (U. S. Patent # US PP20,648 P3, January 19, 2010.)
683. Pierron-Darbonne, A. Strawberry plant named 'Dream' (U. S. Patent # US 2015/0020249 P1, January 15, 2015.)
684. Pierron-Darbonne, A. Strawberry plant named 'Planasa 02-32' (U. S. Patent # US PP23,903 P3, September 17, 2013.)
685. Pierron-Darbonne, A. Strawberry plant named 'Sabrina' (U. S. Patent # US 2010/0313317 P1, December 9, 2010.)
686. Pierron-Darbonne, A. Strawberry plant named Safari (U. S. Patent # US 2014/0352011 P1, November 27, 2014.)
687. Pierron-Darbonne, A. Strawberry plant named 'Sahara' (U. S. Patent # US PP26,289 P3, January 5, 2016.)
688. Plant Sciences, Inc., Watsonville, USA. 'PE-6.2036' (IP Australia PBR Application 2014/342, March 16, 2015.)
689. Pullen, E. J., Stewart, P. J., Gilford, K. L. & Mowrey, B. D. Strawberry plant named 'DrisStrawTwentyFour' (U. S. Patent # US PP23,378 P2, February 5, 2013.)
690. Pullen, E. J., Stewart, P. J., Gilford, K. L. & Mowrey, B. D. Strawberry plant named 'DrisStrawTwentyThree' (U. S. Patent # US PP23,401 P2, February 19, 2013.)
691. Rogers, T., Claessens, A. G., Sjulín, T. M. & Fear, C. D. Strawberry plant named 'DrisStrawFive' (U. S. Patent # US PP20,248 P3, September 1, 2009.)
692. Rubio, I. A. Strawberry plant named 'Carmela' (U. S. Patent # US PP15,783 P3, June 7, 2005.)
693. Rubio, I. A. Strawberry plant named 'Macarena' (U. S. Patent # US PP16,898 P3, August 1, 2006.)
694. Sanford, J., Ourecky, D., Reich II, J. & Maloney, K. Strawberry Seneca (U. S. Patent # Plant 8,991, November 29, 1994.)

695. Schwartze, C. D. & Sakuma, A. Strawberry plant – SS484 (U. S. Patent # Plant 5,882, February 17, 1987.)
696. Shaw, D. V. Strawberry plant named 'Aromas' (U. S. Patent # Plant 10,451, June 16, 1998.)
697. Shaw, D. V. Strawberry plant 'Diamante' (U. S. Patent # Plant 10,435, June 9, 1998.)
698. Shaw, D. V. Strawberry plant named 'Gaviota' (U. S. Patent # Plant 10,461, June 23, 1998.)
699. Shaw, D. V. Strawberry plant named 'Pacific' (U. S. Patent # Plant 10,436, June 9, 1998.)
700. Shaw, D. V. & Larson, K. D. Strawberry plant named 'Albion' (U. S. Patent # US PP16,228 P3, January 31, 2006.)
701. Shaw, D. V. & Larson, K. D. Strawberry plant named 'Benicia' (U. S. Patent # US PP22,542 P3, March 6, 2012.)
702. Shaw, D. V. & Larson, K. D. Strawberry plant named 'Cabrillo' (U. S. Patent # US PP27,830 P3, April 4, 2017.)
703. Shaw, D. V. & Larson, K. D. Strawberry plant named 'Camino Real' (U. S. Patent # US PP13,079 P2, October 15, 2002.)
704. Shaw, D. V. & Larson, K. D. Strawberry plant named 'Grenada' (U. S. Patent # US PP26,708 P3, May 10, 2016.)
705. Shaw, D. V. & Larson, K. D. Strawberry plant named 'Merced' (U. S. Patent # US PP25,436 P3, April 14, 2015.)
706. Shaw, D. V. & Larson, K. D. Strawberry plant named 'Monterey' (U. S. Patent # US PP19,767 P2, February 24, 2009.)
707. Shaw, D. V. & Larson, K. D. Strawberry plant named 'Palomar' (U. S. Patent # US PP19,472 P3, November 25, 2008.)
708. Shaw, D. V. & Larson, K. D. Strawberry plant named 'Portola' (U. S. Patent # US PP20,552 P3, December 15, 2009.)
709. Shaw, D. V. & Larson, K. D. Strawberry plant named 'San Andreas' (U. S. Patent # US PP19,975 P2, May 12, 2009.)
710. Simpson, D. W. Strawberry plant named 'Mayflower' (U. S. Patent # US PP24,394 P2, April 22, 2014.)
711. Simpson, D. W., Whitehouse, A. B. & Johnson, A. W. Strawberry plant named 'Buddy' (U. S. Patent # US 2013/0097755 P1, April 18, 2013.)
712. Sjulín, T. M. *et al.* Strawberry plant named 'Alta Vista' (U. S. Patent # Plant 11,554, October 10, 2000.)
713. Sjulín, T. M. & Amorao, A. Q. Strawberry plant named 'Coronado' (U. S. Patent # Plant 10,221, February 3, 1998.)
714. Sjulín, T. M., Amorao, A. Q. & Espejo Jr., J. I. Strawberry plant called 'Avila' (U. S. Patent # Plant 8,745, May 24, 1994.)
715. Sjulín, T. M., Amorao, A. Q. & Espejo Jr., J. I. Strawberry plant called 'Balboa' (U. S. Patent # Plant 9,130, May 9, 1995.)
716. Sjulín, T. M., Amorao, A. Q. & Espejo Jr., J. I. Strawberry plant called 'Key Largo' (U. S. Patent # Plant 8,649, March 22, 1994.)
717. Sjulín, T. M., Amorao, A. Q. & Espejo Jr., J. I. Strawberry plant called 'X13' (U. S. Patent # Plant 8,970, November 8, 1994.)
718. Sjulín, T. M., Amorao, A. Q., Espejo, J. I. & Coss, J. F. Strawberry plant named 'Lido' (U. S. Patent # Plant 10,534, August 4, 1998.)
719. Sjulín, T. M., DeRuse, J. T. & Coss, J. Strawberry plant named 'Driscoll Jubilee' (U. S. Patent # US PP15,435 P2, December 14, 2004.)
720. Sjulín, T. M., DeRuse, J. T. & Mowrey, B. D. Strawberry plant named 'Driscoll Coronation' (U. S. Patent # US PP15,308 P2, November 9, 2004.)
721. Small, D. & Bagdasarian, J. Strawberry plant named 'Catalina' (U. S. Patent # Plant 9,320, October 10, 1995.)
722. Small, D. W. Strawberry plant named 'Cal Giant 2' (U. S. Patent # US PP12,221 P2, November 27, 2001.)
723. Small, D. W. Strawberry plant named 'Cal Giant 3' (U. S. Patent # US PP12,403 P2, February 12, 2002.)

724. Small, D. W. Strawberry plant named 'Cal Giant 4' (U. S. Patent # US PP12,423 P2, February 26, 2002.)
725. Small, D. W. Strawberry plant named 'Cal Giant 5' (U. S. Patent # US PP15,087 P2, August 17, 2004.)
726. State of Israel, Ministry of Agriculture, Bet Dagan, Israel. 'Dorit' (IP Australia PBR Application 1992/112, August 24, 1992.)
727. State of Israel, Ministry of Agriculture, Bet Dagan, Israel. 'Ofra' (IP Australia PBR Application 1992/114, August 22, 1992.)
728. State of Israel, Ministry of Agriculture, Bet Dagan, Israel. 'Malah (IP Australia PBR Application 1997/235, October 20, 1997)
729. State of Israel, Ministry of Agriculture, Bet Dagan, Israel. 'Smadar' (IP Australia PBR Application 1992/111, August 24, 1992.)
730. State of Queensland, Dutton Park , QLD 4102, Australia; Horticulture Innovation Australia Ltd, Chifley Square, Sydney, NSW, Australia. 'Scarlet Rose-ASBP' (IP Australia PBR Application 2017/093, June 07, 2017)
731. State of Queensland, Dutton Park , QLD 4102, Australia, Horticulture Innovation Australia Ltd, Chifley Square, Sydney, NSW, Australia. 'Sunglow-ASBP' (IP Australia PBR Application 2017/170, July 6, 2017.)
732. State of Queensland acting through the Department of Agriculture and Fisheries, Brisbane, QLD and Horticulture Innovation Australia Limited, Sydney, NSW. 'Parisienne Kiss' (IP Australia PBR Application 2015/216, August 12, 2015.)
733. State of Queensland acting through the Department of Agriculture and Fisheries, Brisbane, QLD and Horticulture Innovation Australia Limited, Sydney, NSW. 'Scarlet Splendour' (IP Australia PBR Application 2015/215, August 12, 2015.)
734. State of Queensland acting through the Department of Agriculture, Fisheries and Forestry, Brisbane, QLD and Horticulture Australia Limited, Sydney, NSW. 'Red Rhapsody' (IP Australia PBR Application 2013/312, December 18, 2013.)
735. State of Queensland acting through the Department of Employment, Economic Development and Innovation Brisbane, QLD and Horticulture Australia Limited, Sydney, NSW. 'Aussigem' (IP Australia PBR Application 2010/174, September 30, 2010.)
736. State of Queensland acting through the Department of Employment, Economic Development and Innovation Brisbane, QLD and Horticulture Australia Limited, Sydney, NSW. 'Suncoast Delight' (IP Australia PBR Application 2010/172, September 30, 2010.)
737. State of Queensland acting through the Department of Employment, Economic Development and Innovation Brisbane, QLD and Horticulture Australia Limited, Sydney, NSW. 'Sunblushgem' (IP Australia PBR Application 2010/173, September 30, 2010.)
738. State of Queensland through its Department of Primary Industries, Brisbane, QLD. 'QHI Earliblush' (IP Australia PBR Application 2000/174, June 20, 2000.)
739. State of Queensland through its Department of Primary Industries, Brisbane, QLD. 'QHI Earlimist' (IP Australia PBR Application 2000/173, June 20, 2000.)
740. State of Queensland through its Department of Primary Industries, Brisbane, QLD. 'Kabarla' syn. 'Redlands Kabarla', '45/90' (IP Australia PBR Application 1995/192, July 31, 1995.)
741. State of Queensland through its Department of Primary Industries, Brisbane, QLD. 'Maroochy Blaze' (IP Australia PBR Application 1997/257, October 7, 1997)
742. State of Queensland through its Department of Primary Industries, Brisbane, QLD. 'Maroochy Flame' (IP Australia PBR Application 1997/256, October 7, 1997.)
743. State of Queensland through its Department of Primary Industries, Brisbane, QLD. 'Maroochy Starfire' (IP Australia PBR Application 1997/255, October 7, 1997.)

744. State of Queensland through its Department of Primary Industries, Brisbane, QLD. 'Maroochy Sundew' (IP Australia PBR Application 1999/026, January 28, 1999.)
745. State of Queensland through its Department of Primary Industries, Brisbane, QLD. 'Maroochy Jewel' (IP Australia PBR Application 1999/025, January 28, 1999.)
746. State of Queensland through its Department of Primary Industries, Brisbane, QLD. 'Redlands Horizon' syn '24/86' (IP Australia PBR Application 1991/072, August 14, 1991.)
747. State of Queensland through its Department of Primary Industries, Brisbane, QLD. 'Redlands Hope' syn '192/90' (IP Australia PBR Application 1992/084, June 11, 1992.)
748. State of Queensland through its Department of Primary Industries, Brisbane, QLD. 'Redlands Joy' syn. '171/90' (IP Australia PBR Application 1992/088, June 11, 1992.)
749. State of Queensland through its Department of Primary Industries, Brisbane, QLD and Horticulture Australia Limited, Sydney, NSW. 'DPI Rubygem' (IP Australia PBR Application 2003/355, February 2, 2004.)
750. State of Queensland through its Department of Primary Industries, Brisbane, QLD and Horticulture Australia Limited, Sydney, NSW. 'DPI Twotwelve' (IP Australia PBR Application 2003/270, February 2, 2004.)
751. State of Queensland through its Department of Primary Industries and Fisheries, and Horticulture Australia Limited, Sydney, NSW. 'Parisienne Belle' (IP Australia PBR Application 2008/127, July 2, 2008.)
752. State of Queensland through its Department of Primary Industries, Brisbane, QLD and Horticulture Australia Limited, Sydney, NSW. 'QHI Brighteyes' (IP Australia PBR Application 2003/111, November 12, 2003.)
753. State of Queensland through its Department of Primary Industries, Brisbane, QLD and Horticulture Australia Limited, Sydney, NSW. 'QHI Crimsonglow' (IP Australia PBR Application 2003/277, December 24, 2003)
754. State of Queensland through its Department of Primary Industries, Brisbane, QLD and Horticulture Australia Limited, Sydney, NSW. 'QHI Harmony' (IP Australia PBR Application 2003/112, November 12, 2003.)
755. Sterrett, J. Strawberry plant named 'NB-1' (U. S. Patent # US PP13,986 P2, July 15, 2003.)
756. Stewart, P. J. *et al.* Strawberry plant named 'DrisStrawFortyOne' (U. S. Patent # US PP25,699 P3, July 14, 2015.)
757. Stewart, P. J., Coss, J. F. & Edmondson, A. M. Strawberry plant variety named 'DrisStrawFiftyThree' (U. S. Patent # US PP29,749 P2, October 16, 2018.)
758. Stewart, P. J., Coss, J. E., Madesko, M. P. & Mowrey, B. D. Strawberry plant named 'DrisStrawTwentyEight' (U. S. Patent # US PP23,459 P2, March 12, 2013.)
759. Stewart, P. J., Ferguson, M. D., Robertson, R. & Coss, J. F. Strawberry plant named 'DrisStrawFortyFour' (U. S. Patent # US PP26,801 P3, June 7, 2016.)
760. Stewart, P. J., Madesko, M. P., Coss, J. F. & Mowrey, B. D. Strawberry plant named 'DrisStrawFifteen' (U. S. Patent # US PP21,762 P2, March 8, 2011.)
761. Stewart, P. J., Madesko, M. P., Coss, J. F. & Mowrey, B. D. Strawberry plant named 'DrisStrawFourteen' (U. S. Patent # US PP22,040 P3, July 26, 2011)
762. Stewart, P. J., Robertson, R., Coss, J. F., Madesko, M. P. & Renteria, A. M. Strawberry plant named 'DrisStrawFortyThree' (U. S. Patent # US 2016/0113175 P1, April 21, 2016.)
763. Stoppel, P. Variety of strawberry plant named 'Malwina' (U. S. Patent # US PP23,246 P3, December 11, 2012.)
764. Suiker, M. E. Strawberry plant named 'Flair' (U. S. Patent # US PP23,162 P2, November 6, 2012.)
765. Tufaro, N. Strawberry plant named 'Charlene' (U. S. Patent # US 2016/0029529 P1, January 28, 2016.)
766. Tufaro, N. Strawberry plant named 'Margherita' (U. S. Patent # US 2014/0020144 P1, January 16, 2014.)
767. Tufaro, N. Strawberry plant named 'Marisol' (U. S. Patent # US PP25,637 P3, June 23, 2015.)

768. Tufaro, N. Strawberry plant named 'Melissa' (U. S. Patent # PP28,081 P3, June 6, 2017.)
769. Vinson, P. E. *Fragaria* plant named 'SRV36' (U. S. Patent # US 2018/0098472 P1, April 5, 2018.)
770. Vinson, P. E. *Fragaria* plant named 'Verity' (U. S. Patent # US PP25,794 P2, August 11, 2015.)
771. Vinson, P. E. & Ilona, E. M. Strawberry plant named 'SSL 93' (U. S. Patent # US 2014/0298549 P1, October 2, 2014.)
772. Vinson, P. E. & Warren, S. P. Strawberry plant – Evita variety (U. S. Patent # Plant 9,091, March 28, 1995.)
773. Vinson, P. E. & Warren, S. P. Strawberry plant named 'Eves Delight' (U. S. Patent # US PP21,381 P3, October 12, 2010)
774. Vinson, P. E. & Warren, S. P. Strawberry plant named 'Sweet Eve' (U. S. Patent # US PP21,380 P3, October 12, 2010.)
775. Vinson, P. E. & Warren, S. P. Strawberry plant named 'Viva Patricia' (U.S. Patent # US PP22,717 P3, May 8, 2012.)
776. Vitten, M. D., Fear, C. D. & Johnson, A. Strawberry plant named 'DrisStrawThirtyFive' (U. S. Patent # US PP24,745 P2, August 12, 2014.)
777. Vitten, M. D., Fear, C. D. & Johnson, A. Strawberry plant named 'DrisStrawThirtyNine' (U. S. Patent # US PP25,408 P3, April 7, 2015.)
778. Vitten, M. D., Fear, C. D. & Mowrey, B. D. Strawberry plant named 'DrisStrawThirtyEight' (U. S. Patent # US PP25,437 P3, April 14, 2015.)
779. Vitten, M. D., Fear, C. D. & Mowrey, B. D. Strawberry plant named 'DrisStrawThirtyTwo' (U. S. Patent # US PP24,333 P3, March 25, 2014)
780. Vitten, M. D., Fear, C. D. & Pakozdi, K. Strawberry plant named 'DrisStrawFortyFive' (U. S. Patent # US 2016/0270276 P1, September 15, 2016.)
781. Vitten, M. D., Fear, C. D. & Pakozdi, K. Strawberry plant named 'DrisStrawFortySix' (U. S. Patent # US 2016/0302339 P1, October 13, 2016.)
782. Vitten, M. D., Fear, C. D. & Sánchez, R. F. Strawberry plant named 'DrisStrawThirtyFour' (U. S. Patent # US PP24,395 P3, April 22, 2014.)
783. Vitten, M. D., Sánchez, R. F., Fear, C. D. & Pakozdi, K. Strawberry plant named 'DrisStrawFifty' (U. S. Patent # US PP29,289 P3, May 15, 2018.)
784. Voth, V. & Bringhurst, R. S. Strawberry plant 'Chandler' (U. S. Patent # Plant 5,262, July 24, 1984.)
785. Voth, V. & Bringhurst, R. S. Strawberry plant called Irvine (U. S. Patent # Plant 7,172, February 27, 1990.)
786. Voth, V. & Bringhurst, R. S. Strawberry plant called 'Oso Grande' (U. S. Patent # Plant 6,578, January 31, 1989.)
787. Voth, V. & Bringhurst, R. S. Strawberry plant 'Parker' (U. S. Patent # Plant 5,263, July 24, 1984.)
788. Voth, V. & Bringhurst, R. S. Strawberry plant 'Santana' (U. S. Patent # Plant 5,268, August 7, 1984.)
789. Voth, V. & Bringhurst, R. S. Strawberry plant 'Tustin' (U. S. Patent # Plant 5,265, July 31, 1984)
790. Voth, V., Shaw, D. V. & Bringhurst, R. S. Strawberry plant called Anaheim (U. S. Patent # Plant 8,659, March 29, 1994.)
791. Voth, V., Shaw, D. V. & Bringhurst, R. S. Strawberry plant called 'Camarosa' (U. S. Patent # Plant 8,708, May 3, 1994.)
792. Voth, V., Shaw, D. V. & Bringhurst, R. S. Strawberry plant called "Carlsbad" (U. S. Patent # Plant 8,660, March 29, 1994.)
793. Voth, V., Shaw, D. V. & Bringhurst, R. S. Strawberry plant named 'Laguna' (U. S. Patent # Plant 8,663, March 29, 1994.)
794. Weber, C. A. Strawberry plant named 'Archer' (U. S. Patent # US 2019/0069456 P1, February 28, 2019.)
795. Weber, C. A. Strawberry plant named 'Herriot' (U. S. Patent # US PP24,613 P3, July 8, 2014.)



796. Weber, C. A., Sanford, J. C. & Maloney, K. E. Strawberry plant named 'Clancy' (U. S. Patent # US PP16,571 P3, May 23, 2006.)
797. Weber, C. A., Sanford, J. C. & Maloney, K. E. Strawberry plant named 'L'Amour' (U. S. Patent # US PP16,480 P3, April 25, 2006.)
798. Weber, C. A. Strawberry plant named 'Walker' (U. S. Patent # US 2014/0068826 P1, March 6, 2014.)
799. Whitaker, V. M. & Chandler, C. K. Strawberry plant named 'Florida127' (U. S. Patent # US PP25,574 P3, May 26, 2015.)
800. Whitaker, V. M. & Chandler, C. K. Strawberry plant named "Florida Sensation" (U. S. Patent # US 2014/0359905 P1, December 4, 2014.)
801. Whitaker, V. M. & Herrington, M. Strawberry plant named 'Florida Beauty' (U. S. Patent # US PP30,385 P3, April 16, 2019.)
802. Wray, E. P. Strawberry (U. S. Patent # Plant 101)
803. Yosef, E. & Meizles, A. Strawberry plant called 'Rotemi' (U. S. Patent # US PP20,970 P3, May 4, 2010.)
804. Yoseph, E. & Meizles, A. Strawberry plant named 'Shaked' (U. S. Patent # US 2010/0064399 P1, March 11, 2010.)
